# Supplementary material for: Distribution and degradation of terrestrial organic matter in the sediments of peat-draining rivers, Sarawak, Malaysian Borneo
Source: Copernicus journal article supplement (doi:10.5194/bg-2019-94), 2019-04-10
Supplement: Supplementary file [file bg-2019-94-AC1-supplement.pdf]

1 **Distribution and degradation of terrestrial organic matter in the**  
2 **sediments of peat-draining rivers, Sarawak, Malaysian Borneo**

3

4 Ying Wu<sup>1</sup>, Kun Zhu<sup>1</sup>, Jing Zhang<sup>1</sup>, Moritz Müller<sup>2</sup>, Shan Jiang<sup>1</sup>, Aazani Mujahid<sup>3</sup>, Mohd  
5 Fakharuddin Muhamad<sup>3</sup>, Edwin Sien Aun Sia<sup>2</sup>

6 1 State Key Laboratory of Estuary and Coastal Research, East China Normal University,  
7 Shanghai, China.

8 2 Faculty of Engineering, Computing and Science Swinburne, University of Technology,  
9 Sarawak campus, Malaysia.

10 3 Faculty of Resource Science & Technology, University Malaysia Sarawak, Sarawak, Malaysia.

11

12 Correspondence,

13 Ying Wu, wuying@sklec.ecnu.edu.cn

14

15

16 **Abstract.**

17 Tropical peatlands are one of the largest pools of terrestrial organic carbon (OC<sub>terr</sub>); however,  
18 our understanding of the dynamics of OC<sub>terr</sub> in peat-draining rivers remains limited, especially  
19 in Southeast Asia. This study used bulk parameters and lignin phenols concentrations to  
20 investigate the characteristics of OC<sub>terr</sub> in a tropical peat-draining river system (the main  
21 channel of the Rajang and three smaller rivers (the Maludam, Simunjan, and Sebuyau)) in the  
22 western part of Sarawak, Malaysian Borneo. The depleted  $\delta^{13}\text{C}$  levels and lignin composition  
23 of the organic matter indicates that the most important plant source of the organic matter in  
24 these rivers is woody angiosperm C<sub>3</sub> plants, especially in the three small rivers sampled. The  
25 diagenetic indicator ratio (i.e., the ratio of acid to aldehyde of vanillyl phenols ((Ad/Al)<sub>v</sub>))  
26 increased with decreasing mean grain size of sediment from the small rivers. The selective  
27 sorption of acid relative to aldehyde phenols might explain the variations in the (Ad/Al)<sub>v</sub> ratio.  
28 Elevated (Ad/Al)<sub>v</sub> values observed from the Maludam's sediments may be also attributed to  
29 source plant variations. The (Ad/Al)<sub>v</sub> ratio appears to be related to the C/N ratio (the ratio of  
30 total organic carbon to total nitrogen) in the Rajang and small rivers. In small rivers, a quick  
31 decline of C/N ratios responses to the slower modification of (Ad/Al)<sub>v</sub> ratio by the meant of  
32 better preservation of lignin phenols. The accumulation of lignin phenols with higher total  
33 nitrogen percentage (TN%) in the studied systems were observed. Most of the OC<sub>terr</sub>  
34 discharged from the Rajang and small river systems was material derived from woody  
35 angiosperm plants with limited diagenetic alteration before deposition, and so could potentially  
36 provide significant carbon to the atmosphere after degradation.

37

38 **1 Introduction**

39 Tropical peatlands are one of the biggest terrestrial organic carbon pools, accounting for about  
40 89,000 Tg (Moore et al., 2013; Rieley et al., 1996, 2008). It is reported that about 77% of the  
41 carbon stored in all tropical peatlands is derived from Southeast Asia, which equals to 11%–

42 14% of the total carbon pool stored in all peat. However, increasing anthropogenic disturbance  
43 in the form of land use change, drainage and biomass burning are converting this peat into a  
44 globally significant source of atmospheric carbon dioxide (Dommain et al., 2014; Miettinen et  
45 al., 2016; Koh et al., 2009; Page et al., 2011). The rivers draining these peatlands are typically  
46 rich in lignin phenols and humic substances, and are often referred to as “blackwater” rivers  
47 (Baum et al., 2007; Cook et al., 2017; Moore et al., 2011). However, knowledge of the fate of  
48 terrigenous organic matter in such peat-draining rivers and estuaries remains limited (Gandois  
49 et al., 2014; Hall et al., 2015; Lourençato et al., 2019).

50 The transport, degradation, and sequestration of OC<sub>terr</sub> in river systems are important because  
51 of their roles in constraining carbon cycle budgets (Aufdenkampe et al., 2011; Battin et al., 2009;  
52 Feng et al., 2016; Spencer et al., 2010; Wu et al., 2018). In terms of transport within fluvial  
53 systems, OC<sub>terr</sub> is subject to various natural processes, such as photo bleaching, microbial  
54 degradation, and selective preservation, as well as anthropogenic activities e.g. dam  
55 construction, irrigation systems, and land use change (Bao et al., 2015; Hernes et al., 2017;  
56 Spencer et al., 2010; Wu et al., 2015, 2018). Thus, it can be difficult to distinguish OC<sub>terr</sub>  
57 behavior from dynamics within a fluvial system. Multiple geochemical approaches have been  
58 applied to elucidate the composition and fate of OC<sub>terr</sub> in riverine and coastal sediments,  
59 including C/N ratios,  $\delta^{13}\text{C}$  composition, and the distribution and composition of specific  
60 biomarker compounds such as lignin phenols and plant wax n-alkanes (Bao et al., 2015;  
61 Drenzek et al., 2007; Goñi et al., 2005; Hernes and Benner, 2002; Jex et al., 2014; Ward et al.,  
62 2013). Lignin, which constitutes up to 30% of vascular plant biomass, is a unique biomarker of  
63 OC<sub>terr</sub> although highly degraded soil organic matter may be devoid of any apparent lignin but  
64 as another important contributor to OC<sub>terr</sub> (Burdige, 2005; Goñi and Hedges, 1995; Hedges  
65 and Mann, 1979). The monomeric composition of lignin phenols (S, V, C series) provides useful  
66 information on the biological source (woody *versus* nonwoody and angiosperm *versus*  
67 gymnosperm) and oxidation stage of lignin in natural environments (Benner et al., 1984;

68 Hedges et al., 1985; Dittmar and Lara, 2001; Tareq et al., 2004; Thevenot et al., 2010). Most  
69 studies designed to understand the sources, compositions and transport of exported OC<sub>terr</sub> to  
70 determine its impact on the carbon cycle have been carried out in large rivers in the temperate  
71 and polar zones (Bao et al., 2015; Bianchi et al., 2002, 2011; Drenzek et al., 2007; Goñi et al.,  
72 1998, 2005; Feng et al., 2016; Wu et al., 2015, 2018). In contrast, lignin signatures from tropical  
73 environments have received less attention, especially in small river systems (Alin et al., 2008;  
74 Alkhatib et al., 2007; Dittmar and Lara, 2001; Goñi et al., 2006; Hedges et al. 1986; Spencer et  
75 al., 2010; Sun et al., 2017; Pradhan et al., 2014).

76 The export of OC<sub>terr</sub> in tropical river systems is typically constrained by natural rainfall,  
77 typhoons, floods, and tectonic activity (Alin et al., 2008; Aufdenkampe et al., 2007; Bao et al.,  
78 2015). Elevated soil turnover rates, coupled with short water residence times in small tropical  
79 river catchments, lead to the accelerated transformation of terrestrial organic matter (OM),  
80 especially during high-discharge events (Bao et al., 2015; Goldsmith et al., 2008; Kao and Liu,  
81 1996). Anthropogenic processes such as deforestation have been proved to be a major cause  
82 of altered hydrology and OM compositions in tropical river systems (Houghton et al., 2000;  
83 Jennerjahn et al., 2004, 2008; Pradhan et al., 2014). The current paucity of information on  
84 OC<sub>terr</sub> characteristics and its export by rivers from tropical peat-draining rivers remains a major  
85 gap in our understanding of OC<sub>terr</sub> biogeochemical cycling in rivers from tropical Southeast  
86 Asia. Previous studies have reported that peatland-draining rivers in Sumatra and Borneo  
87 contained the highest values of dissolved organic carbon (DOC) in rivers globally (3000–5500  
88  $\mu\text{mol L}^{-1}$ ), and most of the terrestrial DOC delivered into the sea (Wit et al., 2015). To  
89 understand the biogeochemical processing of OC<sub>terr</sub> in Southeast Asia, more work is needed  
90 on the dynamics of OC<sub>terr</sub> in the fluvial systems of this region.

91 Here we present what is, to our knowledge, the first analysis of OC<sub>terr</sub> concentration and  
92 behavior in four rivers and estuarine regions in the western part of Sarawak, Malaysian Borneo.  
93 We examined the OC<sub>terr</sub> characteristics using the lignin phenols composition from various

94 samples (e.g., plants, soils, and sediments) from a major river, the Rajang, and three adjacent  
95 small rivers (the Maludam, Simunjan, and Sebuyau) to resolve the sources and transformation  
96 processes in the wet *versus* dry season. We further compared data among the four rivers to  
97 determine the ultimate fate of lignin and the potential controls on its distribution. Our results  
98 also indicate that lignin composition links to sources and modifications along the river–peat/soil–  
99 estuary continuum and reveal its response to peat degradation.

100

## 101 **2 Materials and methods**

### 102 **2.1 Study region and sample collection**

103 Samples were collected during three field expeditions to Sarawak in August 2016 (only the  
104 Rajang), early March 2017 (the Rajang and the three small rivers), and September 2017 (only  
105 the small rivers; Fig. 1). During the 2017 expeditions, typical plants (Table S2) and soil samples  
106 were also collected for the comparison study.

107 The Rajang River drainage basin covers an area of about 50,000 km<sup>2</sup>. Elevations exceed 2000  
108 m and hill slopes are steep, generally in excess of 25° in the interior highlands and 20° in  
109 lower areas (Martin et al., 2018). The three small rivers (the Maludam, Simunjan, and Sebuyau)  
110 are blackwater rivers that draining extensive peatlands (Fig. 1). The drainage basin of the  
111 Maludam is about 91.4 km<sup>2</sup> and majority of the river located in the Maludam National Park with  
112 10m thick peat (Muller et al., 2015). The other two rivers are highly human disturbed with  
113 intensive oil palm and sago plantations. For the Rajang, it is separated into two parts by Sibu  
114 Town, upper reaches mainly drain mineral soils, while down reaches develop multiple  
115 distributary channels (e.g., the lower Rajang, Serendeng, Igan; Fig. 1). These channels are also  
116 surrounded by broad peatlands. It is reported that peat greater than 1m thick covered 50% of  
117 the delta plain (Staub et al., 2000). However, Deforestation and changing in land use are  
118 accelerating the peatland degradation (Fig. 1). More than 50% peatland (11% of the  
119 catchment size) in Rajang watershed has been occupied by industry plantation (e.g. oil palm)

120 (Miettinen et al., 2016). Fishery, logging and timber processing are the traditional supports for  
121 local citizens (Miettinen et al., 2016).

122 The climate of the study area is classified as tropical ever-wet, with average rainfall in excess  
123 of 3700 mm/year. The average monthly water discharge of the Rajang is about 3600 m<sup>3</sup>/s, with  
124 peak discharge (~25,000 m<sup>3</sup>/s) observed during the northeastern monsoon season (December  
125 to March; Staub et al., 2000). However, the amount of suspended sediments delivered from the  
126 Rajang basin to the delta plain demonstrated slightly variation (2.0MT/s dry season *versus* 2.2  
127 MT/s wet season) but changed substantially about the amount of sediment delivered from the  
128 delta plain to the South China Sea (Staub et al., 2000). It is estimated that the annual sediment  
129 discharge of the Rajang is 30 Mt. The turbidity maximum in the lower Rajang channels occurred  
130 during the low or reduced discharge period. It is reported that up to 24 Mt of sediment is  
131 deposited in the delta front with preserved annual sediment layers at the order of one cm thick  
132 (Staub et al., 2000). The water discharge of the Maludam is quite low, only 4.4±0.6 m<sup>3</sup>/s, from  
133 the 91.4 km<sup>2</sup> catchment (Muller et al., 2015). The river length of Maludam is 33 km. For the  
134 Sebuyau and Simunjan, river length is 58 and 54 km, respectively (Martin et al., 2018). However,  
135 hydraulic information for these two rivers is largely unknown. The three sampling periods  
136 resembled the end of this northeastern monsoon (i.e., March, the end of the wettest season of  
137 the year) and were shortly before the beginning of the northeastern monsoon (i.e., August and  
138 September, the end of the drier season).

139 The surface sediments were sampled at the middle stream of river using grab samplers from a  
140 small boat at each station and then 0 - 5 cm subsamples were collected and frozen (-20°C)  
141 until they were dried for subsequent analyses in the laboratory. Soil sampling was conducted  
142 at the same time along the Rajang river bank where the sites have minimal human disturbances  
143 and short soil cores were collected and mixed *in situ* as one composite sample for the depth of  
144 0-10cm by getting rid of visible roots and detritus. The vegetation of tropical peat swamp forest  
145 is dominated by trees, e.g. the *Anacardiaceae*, *Annonaceae* and *Euphobiaceae* etc. (Page et

146 al., 2006). Fresh, typical vegetations (listed in Table S2) were separately collected by leave,  
147 stem and roots, some detritus, which floating at the surface layer of the river were also collected  
148 for the comparison study. All botanical samples and soils within the basin were collected at the  
149 same time and stored in a freezer. The hydrological parameters of the surface river water (e.g.,  
150 salinity, pH, and temperature) at each station were determined using an Aquaread® multiple  
151 parameters probe (AP-2000).

152

## 153 **2.2 Chemical analyses**

154 Prior to chemical analyses, all botanical samples as well as the soil and sediment samples,  
155 were dried at 55 °C and disaggregated in an agate mortar to form a homogeneous sample.

156 Grain size characteristics were measured directly from aliquots of the surface sediment  
157 samples using a Coulter LS 100Q (Coulter Company, USA), after treatment with 5% H<sub>2</sub>O<sub>2</sub> and  
158 0.2M HCl to dissolve organic matter and biogenic carbonate. The sediment grain sizes are  
159 expressed as the proportions of clay (<4 μm), silt (4–63 μm), and sand (>63 μm), with a  
160 measurement error of ≤5% for the entire dataset. The remaining sediments were ground to 80  
161 mesh (187.5 μm) for elemental, isotopic, and lignin analyses.

162 The concentrations of organic carbon and total nitrogen (TN) were analyzed using a CHNOS  
163 Elemental Analyzer (Vario EL III) with a relative precision of ±5%. The weight percentages of  
164 organic carbon were analyzed after removing the carbonate fraction by vapor phase  
165 acidification. The weight percentages of TN were also analyzed following the same procedure  
166 but without acidification. The stable carbon isotopic composition of the decarbonated sediments  
167 was determined by a Flash EA1112 Elemental Analyzer connected to an Isotope Ratio Mass  
168 Spectrometer (MAT Delta Plus/XP, Finnigan). <sup>13</sup>C/<sup>12</sup>C ratios are expressed relative to the PDB  
169 standard using conventional δ notation. The analytical precision, determined by replicate  
170 analysis of the same sample, was ±0.2‰.

171 Lignin phenols were extracted using the cupric oxide digestion technique (CuO; Hedges and

172 Ertel, 1982; Yu et al., 2011). Briefly, the powdered samples were weighed and placed in O<sub>2</sub> free  
173 Teflon-lined vessels, and digested in a microwave digestion system (CEM MARS5) at 150°C  
174 for 90 min (Goñi and Montgomery, 2000). Samples were then acidified to pH < 2 and phenolic  
175 monomers were extracted into 99:1 (volume ratio) ethyl acetate/petroleum ether, dried, and  
176 stored at -20°C until further analysis. Samples were analyzed as trimethylsilyl derivatives of  
177 N,O-bis(trimethylsilyl)trifluoroacetamide (BSTFA) and trimethylchlorosilane (TMCS; 99:1) by  
178 Agilent 6890N gas chromatography (DB-1 column, FID). The lignin phenols concentration was  
179 quantified using calibration curves based on commercial standards (Sigma Aldrich). Eleven  
180 phenol monomers were extracted and categorized into five groups: syringyl (S, syringaldehyde,  
181 acetosyringone, syringic acid), vanillyl (V, vanillin, acetovanillone, vanillic acid), cinnamyl (C, *p*-  
182 coumaric acid, ferulic acid), *p*-hydroxyl (P, *p*-hydroxybenzaldehyde, *p*-hydroxyacetophenone,  
183 and *p*-hydroxybenzoic acid), and 3,5-dihydroxy benzoic acid (DHBA). Coefficients of analytical  
184 variation associated with phenols values were <10% based on replicate analysis of the same  
185 samples.

186 Ratios of syringyl-to-vanillyl phenols (S/V) and cinnamyl-to-vanillyl phenols (C/V) are often used  
187 to indicate the relative contribution of angiosperm and non-woody tissues versus gymnosperm  
188 wood, respectively (Hedges and Mann, 1979). Since both ratios have been found to decrease  
189 with the preferential degradation of S and C relative to V phenols, lignin phenols vegetation  
190 index (LPVI) was developed to be an alternative approach to evaluate the original of various  
191 type of vegetations (Tareq et al., 2004; Thevenot et al., 2010):

192 Lignin phenols vegetation index (LPVI) =  $\left\{ \frac{S(S+1)}{(V+1)+1} \times \frac{C(C+1)}{(V+1)+1} \right\}$

193 The ratio of P/(V+S) may reflect the diagenetic state of lignin when the other sources of P  
194 phenols (such as protein and tannin) are relatively constant (Dittmar and Lara 2001). The acid-  
195 to-aldehyde (Ad/Al) ratios of V and S phenols are often used to indicate lignin degradation and  
196 increases with increasing lignin oxidation (Otto and Simpson 2006).

197



## 198 **2.3 Statistical analyses**

199 All statistical analyses were carried out using SPSS 10.0 (IBM SPSS Inc., USA) and results  
200 were plotted using Origin software (Origin Lab Inc., USA). Multivariate statistical approaches  
201 such as principle component analysis (PCA) and cluster analysis (CA) are among the most  
202 widely used statistical methods in determining the significance of specific parameters (including  
203 OC%, TN%, mean grain size, clay% and silt%, total lignin phenols concentrations, DHBA and  
204 the ratios of vanillic acid to vanillin ((Ad/Al)V)) within a dataset (Pradhan et al., 2009).  
205 Interrelationships among the sampling points in different rivers were characterized by cluster  
206 analysis using Ward's method (linkage between groups) and similarity measurements in terms  
207 of Euclidian distance, illustrated in dendograms. Errors listed in tables represent standard  
208 deviations for the analytical data. Differences and correlations were evaluated as significant at  
209 the level of  $p < 0.01$ .

210

## 211 **3 Results**

### 212 **3.1 Hydrological parameters, grain size, and bulk elemental and stable isotopic composition of** 213 **vegetation, soil, and sediment**

214 The hydrological parameters for the study area are summarized in Table S1. The salinity of the  
215 lower Rajang system varied significantly (from 12‰ to 32‰) because of saline water intrusion  
216 in the estuarine region, but there were limited pH variations (6.5–7.9). Dissolved oxygen (DO)  
217 levels showed significant spatial variations, with the lowest values (2–3 mg L<sup>-1</sup>) being recorded  
218 in the Igan channel, where dense peats were observed, and the higher values (4–6 mg L<sup>-1</sup>)  
219 recorded in the other two channels. The salinity of the Simunjan indicated that freshwater  
220 dominated, whereas the two other small rivers showed saline water influences. The variation in  
221 pH values among the three small rivers decreased from the Sebuyau (~6.4), to the Simunjan  
222 (~5.1), and the Maludam (~3.7). The DO concentrations in the three small rivers varied in a low  
223 range (average: 2–3 mg L<sup>-1</sup>), with the lowest values in the three systems being around 1.4 mg

224 L<sup>-1</sup>.

225 The compositions of bulk sediments from the Rajang and the three small rivers are presented  
226 in Tables 1 and S1. The mean grain sizes from the upper Rajang ( $212\pm 47\ \mu\text{m}$ ) were much  
227 coarser than those from the lower Rajang ( $40\pm 38\ \mu\text{m}$ ) and the small rivers ( $22\pm 16\ \mu\text{m}$ ). The  
228 finest samples ( $9\pm 2\ \mu\text{m}$ ) were collected from the Maludam in March 2017. Generally, the  
229 samples collected during the dry season were coarser than those from the flood season in the  
230 Maludam and Simunjan, but this was not the case for the Sebuyau. The average organic carbon  
231 content shows a significant negative relationship with mean grain size among these samples  
232 ( $r^2 = 0.67$ ,  $p < 0.01$ ).

233 Mean values of Total organic carbon (TOC) concentrations were higher in the peat-draining  
234 rivers ( $2.2\pm 0.58\%$ ,  $2.6\pm 1.23\%$ , and  $2.6\pm 0.8\%$  for the Maludam, Sebuyau, and Simunjan,  
235 respectively) compared with the lower Rajang ( $1.1\pm 0.5\%$ ), and the lowest values were observed  
236 in the upper Rajang ( $0.12\pm 0.02\%$ ). The highest values of OC were measured in plants samples  
237 and varied from 30%–49% (Table S2). The mean TOC value in the soil samples was  $3.6\pm 0.6\%$   
238 (Table S3).

239 TN content ranged from 0.02% to 0.17% in the samples collected from the Rajang, from 0.09%  
240 to 0.37% in the small rivers, from 0.73% to 1.65% in the vegetation, and averaged  $0.19\pm 0.02\%$   
241 for the soil samples (Tables 1, S2, and S3). Although nitrogen was enriched in the samples  
242 from the peat-draining rivers, they still had higher mean C/N values ( $15.8\pm 3.7$ ) compared with  
243 the lower Rajang ( $11.5\pm 1.6$ ) while vegetation samples, exhibited low N content and high C/N  
244 ( $\text{C/N} = 56\pm 34$ ).

245 The most abundant vegetation collected from the Maludam showed relatively depleted carbon  
246 isotope ratios ( $\delta^{13}\text{C} = -31\text{‰}$ ) that were typical of C<sub>3</sub> vegetation (Table S2). The detritus samples  
247 were also relatively depleted in <sup>13</sup>C ( $\delta^{13}\text{C} = -29.2\text{‰}$ ; Table 1). The isotope ratios of the peat-  
248 draining river's sediments (average  $\delta^{13}\text{C}$  varied at  $-28.2$  —  $-27.4\text{‰}$ ) were comparable with the

249 Rajang's (average  $\delta^{13}\text{C} = -28.6 \pm 0.6\text{‰}$ ) (Tab. 3). The  $\delta^{13}\text{C}$  values of the soil samples are similar  
250 to those of riverine sediments ( $\delta^{13}\text{C} = -28.4\text{‰}$ ).

251

### 252 3.2 Lignin phenols content

253 The lignin phenols obtained after CuO oxidation are expressed as  $\Lambda 8$  ( $\text{mg} (100 \text{ mg OC})^{-1}$ ),

254 except for the lignin yield ( $\Sigma 8$ ), which is the sum of C + S + V and is expressed as  $\text{mg} 10 \text{ g dw}^{-1}$

255  $^{-1}$ , and are presented in Fig. 2 as well as Tables 2 and S1-3. The highest yields were measured

256 in the vegetation samples ( $300\text{--}900 \text{ mg} 10 \text{ g dw}^{-1}$ ). The lignin yield from the soil samples and

257 the three small rivers (average of  $\sim 30 \text{ mg} 10 \text{ g dw}^{-1}$ ) is also higher than that from the Rajang

258 samples (average of  $< 10 \text{ mg} 10 \text{ g dw}^{-1}$ ), with the lowest value observed in the upper Rajang

259 ( $0.16 \text{ mg} 10 \text{ g dw}^{-1}$ ; Table 2). There are correlations between  $\Sigma 8$  and OC% in each river ( $r^2 >$

260  $0.5$ ), with the slope decreasing in the order of Maludam  $>$  Simunjan  $>$  Sebuyau  $>$  Rajang (Fig.

261 2a). The variation in  $\Lambda 8$  from various pools shows a similar distribution as the  $\Sigma 8$  values. The

262 average concentrations for the vegetation, soil, and the four river systems  $\text{mg} (100 \text{ mg OC})^{-1}$

263 approximately 18, 8.3, 5.4  $\text{mg} (100 \text{ mg OC})^{-1}$  (for the Rajang), 6.2  $\text{mg} (100 \text{ mg OC})^{-1}$  (for the

264 Maludam), 7.9 (for the Sebuyau), and 7.4  $\text{mg} (100 \text{ mg OC})^{-1}$  (for the Simunjan), respectively.

265 The C/V and S/V ratios differ with vegetation type (Fig. 2b). Angiosperm leaves show high S/V

266 ( $> 1$ ) and C/V ratios ( $\sim 0.8$ ). Angiosperm wood and root samples show lower C/V ratios ( $< 0.2$ ).

267 The detritus samples show intermediate S/V ratios ( $0.6\text{--}1.0$ ) and lower C/V ratios ( $\sim 0.1$ ). Soil

268 samples have relatively high S/V ( $\sim 1.1$ ) and low C/V ( $\sim 0.07$ ) values. The four rivers show limited

269 variations in S/V ( $0.4\text{--}0.8$ ) and C/V ( $0.02\text{--}0.08$ ) ratios. The LPVI values of the fresh plant

270 material range from 113 to 2854 for leaves and 192 to 290 for wood. The values for detritus

271 range between 36 and 228, and for soil and sediment range between 30 and 60 (Table 2).

272 The ratios of vanillic acid to vanillin ( $(\text{Ad}/\text{Al})_v$ ) and syringic acid to syringaldehyde ( $(\text{Ad}/\text{Al})_s$ )

273 increase slightly from the vegetation to river samples (Table 2). The ratios obtained from the

274 vegetation and soil samples show similar values ( $(\text{Ad}/\text{Al})_s = \sim 0.30$ ;  $(\text{Ad}/\text{Al})_v = \sim 0.35$ ). The ratios

275 from the small river samples range from 0.41 to 0.58 for  $(Ad/Al)_v$  and 0.30 to 0.36 for  $(Ad/Al)_s$ .  
276 The values from the lower Rajang are similar to those from the small rivers, but this is not the  
277 case for the upper Rajang, where higher  $(Ad/Al)_s$  and  $(Ad/Al)_v$  values were recorded. The two  
278 ratios are linearly correlated in all sediment samples ( $r^2 = 0.68$ ,  $p < 0.05$ ), except for the samples  
279 collected from the Simunjan.

280 The  $P/(V + S)$  ratio is low in the vegetation samples, except for the leaf samples ( $P/(V + S) =$   
281  $0.22$ ), which reflects the low P content in most vegetation (Table 2). However, in some plant  
282 samples (*Elaeis guineensis Jacq.*), we detected relative higher P content (Table S2). The  $P/(V$   
283  $+ S)$  ratio is  $0.28 \pm 0.03$  for the soil samples,  $0.18 \pm 0.4$  for the small rivers,  $0.17 \pm 0.02$  for the lower  
284 Rajang, and  $0.51 \pm 0.04$  for the upper Rajang. DHBA is very low in the upper Rajang ( $\sim 0.07$ ),  
285 but higher in the Maludam in the dry season (average value of 0.44). Values in the Simunjan in  
286 both seasons are similar to those from the soil samples ( $\sim 0.38$ ). Higher values of DHBA were  
287 measured in the lower Rajang and the Sebuyau in the dry season than in the wet season.

288

### 289 **3.3 Statistical analyses**

290 The results of cluster and PCA analyses of both bulk geochemical and lignin phenols proxies  
291 for all sediments are shown in Fig. 3. Four distinct groups were identified based on the cluster  
292 analysis. The Maludam and the tributary of the lower Rajang (Igan) are grouped together, and  
293 the Simunjan and Sebuyau are grouped together. The lower Rajang and upper Rajang are  
294 separated from each other (Fig. 3a). Similar groupings are evident in the results of the PCA  
295 analysis, which was based on the distribution of factors 1 and 2 that represent total loadings of  
296 45% and 32%, respectively (Fig. 3b). The PCA results implied that factor 1 showed close  
297 correlations with the  $(Ad/Al)_v$  ratio and grain size while factor 2 showed a close correlation with  
298  $\Sigma 8$  and OC%.

299

## 300 **4 Discussion**

#### 301 4.1 Comparison with systems worldwide: lignin parameters derived from sediment and peat

302 Table 3 summarizes the distribution of bulk and lignin parameters of sediments from typical  
303 systems worldwide. Although the TOC values of our studied systems are lower than peat  
304 samples but the concentrations of lignin phenols are comparable, which are typically enriched  
305 in lignin phenols compared with other river systems (Table 3; Bianchi et al., 2002; Gandois et  
306 al., 2014; Li et al., 2015; Sun et al., 2017; Pradhan et al., 2014; Winterfeld et al., 2015). The  
307 TN values of our peat samples are between two and four times higher than those seen in other  
308 systems worldwide, as was also observed in small rivers along India's west coast (Pradhan et  
309 al., 2014). The higher values of  $\Lambda_8$  found in our studied systems were linked to vegetation  
310 types (trees dominated) (Zacccone et al., 2008) and partially caused by peat-draining and  
311 intense human activity near the watersheds (e.g. land use change and logging activities), as  
312 reported previously (Milliman and Farnsworth, 2011; Moore et al., 2013; Rieley et al., 2008).  
313 Much of the peatland neighboring the Simunjan and Sebuyau catchments has been changed  
314 to palm oil plantations (Martin et al., 2018). The terrigenous OM has been affected by  
315 diagenesis, as  $(Ad/Al)_v$  varies markedly among the different systems (Table 3). The  $(Ad/Al)_v$   
316 values of the sediments sampled here are comparable to fresh and only low to medium  
317 oxidized. Elevated  $(Ad/Al)_v$  values observed from the Maludam's sediments (March, 2017)  
318 may be also attributed to source plant variations as observed in other study case (Zhu et al.,  
319 2019).

320

#### 321 4.2 Origin of sediment organic matter in tropical peat-draining rivers

322 The depleted average  $\delta^{13}C$  values ( $-31.8 \sim -28.1\text{‰}$ ) of our vegetation samples indicate an  
323 insignificant contribution from C4 plants in the study area (Gandois et al., 2014; Sun et al.,  
324 2017). The high C/N ratio (64.8) indicates a predominance of terrestrial high plant species (e.g.,  
325 *Nepenthes sp.* and *Avicennia marina Vierh.*). The  $\delta^{13}C$  and C/N values ( $-27.2\text{‰}$  and 12,  
326 respectively) obtained from the soil and sediments collected near the rivers suggest that

327 terrestrial organic matter is the dominant contributor (Table 1). The cluster and PCA analyses  
328 suggest that there are no significant seasonal differences in these rivers. Previous study  
329 reported that the sediment load from the basin to the delta was no seasonal pattern, combined  
330 with comparable precipitations during our two sampling seasons, our observations matched  
331 (Martin et al., 2018; Staub et al., 2000). The close correlation of factor 2 with OC% and  $\Sigma 8$  in  
332 the PCA suggests factor 2 relates to the source of the organic matter (Fig. 3), as also be  
333 indicated by the strong correlation between OC% and  $\Sigma 8$  ( $r^2$ : 0.53-0.85) (Fig. 2). Correlation of  
334 OC% and  $\Sigma 8$  of the Maludam ( $r^2 = 0.81$ ) show the highest slope, possibly related to its pristine  
335 condition that promotes better conservation of vegetation in its peat. Furthermore, the  
336 differences between the upper and lower Rajang are highlighted by the PCA results (score 1  
337 represents 45% of the total loading while score 2 is 32%) and bulk parameters; i.e., the upper  
338 Rajang drains a mineral soil whereas peat is dominant in the delta region. This also explains  
339 why the Rajang data do not plot with the other small river systems; the linear relationship  
340 between  $\delta^{13}C$  and  $\Sigma 8$  for the Rajang ( $r^2 = 0.92$ ) forms a distinct group separate from the small  
341 rivers ( $r^2 = 0.59$ ).

342 The S/V and C/V ratios are often used as indicators of the vegetation origin of the lignin fraction;  
343 e.g., the woody and non-woody parts of gymnosperm and angiosperms (Hedges and Mann,  
344 1979). The S/V values (<0.8) of the peat-draining rivers are slightly lower than the values of  
345 other peats (<1.5), but the C/V ratios are comparable (Tareq et al., 2004). The differences in  
346 these parameters between the sediments and the vegetation and soils, as illustrated in Fig. 2,  
347 suggests that they are composed mostly of angiosperm wood. This finding is further confirmed  
348 by the LPVI values (Gymnosperm woods: 1, non-woody Gymnosperm tissues, 3-27;  
349 Angiosperm woods: 67-415; non Angiosperm tissues: 176-2782), which are commonly less  
350 than 60 in these sediment samples (Tareq et al., 2004). Previous studies have concluded that  
351 tropical peats are derived mainly from wood (Anderson, 1983; Gandois et al., 2014). For the  
352 Rajang, the LPVI values show a positive linear correlation with  $\Delta 8$  concentrations ( $r^2 = 0.56$ );

353 however, for the small rivers (based on mean values, except the samples collected in March  
354 2017 from the Maludam) this relationship shows a negative correlation ( $r^2 = 0.91$ ). This suggests  
355 that the small rivers receive more lignin derived from woody material, whereas the Rajang has  
356 a mixture of sources. The unusual behavior of the Maludam's samples might be related to the  
357 dominance of finer-grained sediments when compare with the other rivers, because woody  
358 material tends to be concentrated in the coarser fraction (Table 1).

359 P phenols in the Rajang are derived from lignin, as supported by the significant correlation of  
360 the content of P phenols and lignin content ( $r^2 = 0.93$ ). However, there is no correlation between  
361 P phenols and lignin content for the small rivers. All P/V values from the samples (0.13–0.28)  
362 are higher than the average P/V ratio of wood (0.05) are similar to the range observed for leaves  
363 (0.16–6.9; Hedges et al., 1986). Considering this, non-woody angiosperms are the most likely  
364 source of additional lignin. Combined the composition of P and V in plants samples listed in  
365 Table S2, we find some dominant species, e.g. *Dipterocarpaceae*, *Bruguiera ymnorrhiza*(L.)  
366 *Poir.*, *Elaeis guineensis* Jacq. have a relatively higher P/V ration in their non-woody parts.

367

#### 368 4.3 Transformation of lignin signatures in tropical peat-draining rivers

369 (Ad/Al)<sub>v</sub> ratios are often used to evaluate the degradation status of terrestrial OM. The (Ad/Al)<sub>v</sub>  
370 ratios for soils reported in previous studies fall within the range 0.16–4.36, 0.1–0.2 for fresh  
371 angiosperm wood and 0.2–0.6 for non-woody tissues (Hedges et al., 1988; Opsahl and Benner,  
372 1995; Thevenot et al., 2010). In our study, the variability of the (Ad/Al)<sub>v</sub> ratios obtained from the  
373 vegetation, soil, and sediments was limited, with values between 0.3 and 0.58 except from the  
374 samples from the upper Rajang (~1.0), which suggests the mild degradation of OC<sub>terr</sub> in most  
375 samples. The degradation status of lignin is negatively correlated with the  $\Delta 8$  values ( $r^2 = 0.73$ )  
376 in the Rajang, and with a higher degradation signal observed in the upper Rajang, which drains  
377 mineral soils with lower lignin levels (Fig. 4a). However, the  $\Delta 8$  values with (Ad/Al)<sub>v</sub> ratios was  
378 not so significant in the small river systems as we expected, partially resulting from the variation

379 of (Ad/Al)<sub>v</sub> also could be vegetation source controlled (Fig. 4b). In additional, such a distribution  
380 could be related to the grain size effect, as illustrated in Fig. 4c and 4d. Of the sediments  
381 sampled here, the upper Rajang samples contain the largest coarse fraction and the finest  
382 sediments are collected from the Maludam in March 2017. The (Ad/Al)<sub>v</sub> ratios increase with  
383 increasing coarse fraction of the sediments in the Rajang, which is typically observed in other  
384 systems (Bianchi et al., 2002; Li et al., 2015; Sun et al., 2017) (Fig. 4c). The (Ad/Al)<sub>v</sub> ratios  
385 increase with decreasing mean size of the sediments in the small rivers. Selective sorption of  
386 acid to aldehyde might affect the variation of the (Ad/Al)<sub>v</sub> ratio in the small river systems (Hernes  
387 et al., 2007). However, the relatively fresh condition of the OM in the Maludam samples (in  
388 September 2017) might be related to the fluvial supply of fresh vegetation.

389 The syringyl and cinnamyl series are preferentially degraded when compared with the vallinyl  
390 series, resulting in a decrease in the S/V and C/V ratios during lignin degradation (Goni et al.,  
391 1995; Opsahl and Benner, 1995). Our samples show a negative linear relationship between the  
392 S/V and (Ad/Al)<sub>v</sub> ratios in the Rajang samples ( $r^2 = 0.85$ ; Fig. 5a). However, the variation of the  
393 S/V and (Ad/Al)<sub>v</sub> ratios in the small rivers is limited, and a non-linear correlation is evident (Fig.  
394 5b). Both correlations indicate that the decrease in the S/V ratios is linked to degradation, and  
395 this suggests that we should be cautious when using S/V ratios for source evaluation in this  
396 study.

397 Previous studies demonstrated that lignin mineralization in humid tropical forest soils is  
398 dominated by methoxyl-C mineralization under aerobic and fluctuating redox conditions (Hall  
399 et al., 2015). Demethylation reduces the yield of methoxylated phenols (V and S phenols) but  
400 does not affect P phenols. Therefore, the P/(S+V) ratio can be used as an indicator of lignin  
401 transformation (Dittmar and Kattner, 2003). However, in this study the ratio of P/(S+V) in most  
402 sediment samples did not vary greatly (~0.2). Although there was a linear correlation between  
403 the P/(S+V) and (Ad/Al)<sub>v</sub> ratios among all the sediments ( $r^2 = 0.89$ ), no clear trend was observed  
404 for the small rivers, which may suggest both parameter's more links to source instead of



405 diagenetic process in these systems.

406

#### 407 **4.4 Impact of environmental parameters on lignin dynamics**

408 It is well explored that bulk organic matter composition and degradation are influenced by many  
409 environmental factors such as climate, grain size, mineral composition, soil characteristics, land  
410 use changes, logging, and biomass burning (Hernes et al., 2007; Gandois et al., 2014; Sun et  
411 al., 2017; Thevenot et al., 2010). Most Southeast Asian peat-draining rivers are impacted by  
412 human activities such as deforestation, urbanization and damming (Milliman and Farnsworth,  
413 2011). The PCA analysis revealed that the behavior of lignin in the Rajang is substantially  
414 different from that in the three peat-draining rivers, and especially in the upper Rajang, which  
415 drains through a mineral soil with low  $\Delta 8$  values and strong degradation (Figs 3 and 4), since it  
416 was recently shown that lignin could decompose as fast as litter bulk carbon in mineral soils  
417 (Duboc et al., 2014). In the delta region, most parameters were quite comparable, except  $\Sigma 8$   
418 and OC% (Table S1). The higher values of  $\Sigma 8$  and OC% were observed in Simunjan and  
419 Sebuyau, where land use and drainage observed. Usually land use and drainage of tropical  
420 peat will accelerate the loss of vegetation and OC degradation (Kononen, et al., 2016), here it  
421 may be explained by the high content of OC and lignin in oil palm, which is the major plantation  
422 in both regions.

423 In this study, the OC content increases with decreasing grain size, implying that fine sediments,  
424 with larger specific surface areas and rich in clay, contain more OM than coarser sediments, as  
425 reported previously (Sun et al., 2017). Increasing  $(Ad/Al)_v$  values are observed in the Rajang  
426 with increasing grain size, which suggests that lignin associated with larger mineral particles is  
427 more strongly degraded. This observation indicates the preferential preservation of lignin in  
428 finer-grained sediments, resulting from their ability to provide better protection against further  
429 oxidative degradation (Killops and Killops, 2005). For the small river systems, the  $(Ad/Al)_v$   
430 ratios decrease with increasing grain size, corresponding to the increasing  $\Sigma 8$  values (Fig. 4a

431 and b). Our observations of  $(Ad/Al)_v$  values are similar to the trends described by Keil et al.  
432 (1998) and Tesi et al. (2016), who found that lower  $(Ad/Al)_v$  values were present in the coarser  
433 fractions due to the less efficient processing of plant remains prior to deposition. The sediments  
434 collected from the three small peat-draining rivers (except samples from the Maludam in  
435 September, 2017) could contain limited amounts of plant debris, in which case fresh plant tissue  
436 would have been incorporated into the coarser sediment fractions, leading to the low  $(Ad/Al)_v$   
437 values. However, the variation in  $\Sigma 8$  values does not support this speculation, and therefore we  
438 conclude that the selective sorption of acid to aldehyde could explain the elevated  $(Ad/Al)_v$   
439 ratios recorded in the fine fraction. The different grain-size effects on OC<sub>terr</sub> composition, as  
440 seen when comparing the Rajang with the small rivers, suggests that there are other processes  
441 (microbial process, logging etc.) working on OC<sub>terr</sub> in these two systems, which cause post-  
442 depositional changes in the OC<sub>terr</sub> characteristics.

443 Tropical soils are reported naturally poor in N and P, but some studies have shown that with  
444 intensive management (land use/deforestation) they tend to become rich in recalcitrant  
445 compounds, since nitrogen content tends to stimulates decomposition of low-lignin litter by  
446 decomposer microbes, but usually decrease the activity of lignolytic enzymes and inhibit  
447 decomposition of high-lignin litter (Knorr, et al., 2005; Thevenot et al., 2010). In our study, we  
448 found a higher TN% in the small rivers compared with the Rajang. A significant correlation  
449 between  $\Sigma 8$  and TN% ( $r^2= 0.74$ ) is observed in all systems, which might suggest a contribution  
450 from plant litter affecting both parameters (Fig. 6a). The  $(Ad/Al)_v$  ratios appear to be related to  
451 the C/N ratios, but with different slopes obtained for the Rajang and the small rivers (Fig. 6b).  
452 Quicker decline of C/N ratios related to slower lignin degradation in small rivers, this could be  
453 related to the expected impact of nitrogen on lignin degradation (Dignac et al., 2002; Thevenot  
454 et al., 2010). A high N content will inhibit fungal lignin biodegradation (Fog, 1988; Osono and  
455 Takeda, 2001), and this explains why higher lignin phenols with moderate degraded  
456 characteristics was observed in the small river systems in which higher TN% were recorded.

457 The exceptional data were collected during September 2017, which was a time of saline water  
458 intrusion.

459 Large-scale land reclamation, including deforestation and urbanization, has taken place in  
460 Southeast Asia over the past few decades (Miettinen et al., 2016). Logging activities have had  
461 a significant influence on peat decomposition processes and the quality of organic matter inputs  
462 (Hoscilo et al., 2011; Hooijer et al., 2012; Gandois et al., 2014). Gandois et al. (2013) reported  
463 an increase in the N content at a deforested site and concluded that it was caused by an  
464 increase in the microbial deposition of peat. The lignin yield ( $\Sigma 8$ ) is closely correlated with the  
465 OC% in the different rivers (Fig. 2). The highest yield was observed at the Maludam, which  
466 confirmed the significant contribution of plant litter and better preservation due to the low pH  
467 and DO levels, especially woody carbon. However, the relatively higher yield in the Rajang  
468 compared with the other two disturbed peat-draining rivers (i.e., the Simunjan and Sebuyau)  
469 suggests an additional source of lignin, which might implicate the addition of logging residue to  
470 the Rajang systems, as proposed by Gandois et al. (2014).

471

## 472 **5 Conclusions**

473 We used sediment grain size data, TOC contents, the stable carbon isotopic composition of  
474 organic matter, and lignin phenols concentrations to investigate the characteristics of OC<sub>terr</sub> in  
475 a tropical peat-draining river system, as well as its fate and environmental controls. The  
476 depleted  $\delta^{13}\text{C}$  levels of all of the sediment samples demonstrate that contributions from C3  
477 plants dominated the OC<sub>terr</sub> in the study region. The lignin composition of the organic matter  
478 indicates that the most important plant sources of organic matter were woody angiosperm C3  
479 plants, especially in the three small rivers. Our cluster and PCA analyses show no distinct  
480 seasonal variations in the bulk and lignin compositional signatures in the study area, although  
481 the upper Rajang receives contributions from mineral soils with unique lignin parameters and a  
482 coarser grain size. Both the bulk organic matter parameters and the lignin compositions were

483 indicated to be correlated to the grain size of the riverbed sediments. The (Ad/Al)<sub>v</sub> ratios  
484 increased with decreasing mean size of the sediments from the small rivers. Selective sorption  
485 of acid to aldehyde might affect the variation of the (Ad/Al)<sub>v</sub> ratio in the small river systems. Our  
486 samples show a negative linear relationship between the S/V and (Ad/Al)<sub>v</sub> ratios in the Rajang  
487 samples, which implies that the decrease in S/V ratios is linked to degradation. The (Ad/Al)<sub>v</sub>  
488 ratios appear to be related to the C/N ratio in the Rajang and the small rivers. A high N content  
489 will inhibit fungal lignin biodegradation, which might explain higher lignin phenols with moderate  
490 degraded process observed in the small river systems where a higher TN% is recorded. Most  
491 of the OC<sub>terr</sub> discharged from the Rajang and small river systems was composed of woody  
492 angiosperm plants and the terrestrial organic matter undergoes limited diagenetic alteration  
493 before deposition, and could potentially become a significant regional carbon source to the  
494 atmosphere after extensive degradation. This study provides new insights into the amount of  
495 terrestrial OC preserved in the tropical delta region of southeastern Borneo, as well as into the  
496 biogeochemical transformation of OM from terrestrial source to marine sink across this region.

497

498 ***Author contributions.*** YW, JZ, MM, and AM conceptualized the research project and planned  
499 the field expeditions. JZ, MM, AM obtained research funding. JZ, KZ, JS, MM, MFM, EA and  
500 AM collected samples and KZ and YW analyzed the samples. YW, KZ and JZ processed and  
501 analyzed the data. All authors contributed to data interpretation and to the writing of the  
502 manuscript.

503

504 ***Data availability.*** The datasets in the present study are available from the corresponding author  
505 on reasonable request.

506

507 ***Competing interests.*** The authors declare that they have no conflict of interest.

508

509 **Special issue statement.** This article is part of the special issue “Biogeochemical processes in  
510 highly dynamic peat-draining rivers and estuaries in Borneo”. It is not associated with a  
511 conference.

512

### 513 **Acknowledgements**

514 The present research was kindly supported by the Newton-Ungku Omar Fund (NE/P020283/1),  
515 the Natural Science Foundation of China (41530960), China Postdoctoral Science Foundation  
516 (2018M630416), MOHE FRGS 15 Grant (FRGS/1/2015/WAB08/SWIN/02/1) and the SKLEC  
517 Open Research Fund (SKLEC-KF201610). The authors would like to thank the Sarawak  
518 Forestry Department and Sarawak Biodiversity Centre for permission to conduct collaborative  
519 research in Sarawak waters under permit numbers NPW.907.4.4 (Jld.14)-161, Park Permit No  
520 WL83/2017, and SBC-RA-0097-MM. Lukas Chin and the *SeaWonder* crew are acknowledged  
521 for their support during the cruises. Dr. Zhuoyi Zhu, Ms. Lijun Qi, and the Marine  
522 Biogeochemistry Group are especially acknowledged for their contribution and support during  
523 the sampling trips and laboratory analysis.

524

### 525 **References**

- 526 Alin, S. R., Aalto, R., Goñi, M. A., Richey, J. E., and Dietrich, W. E.: Biogeochemical  
527 characterization of carbon sources in the Strickland and Fly rivers, Papua New Guinea, *J. of*  
528 *Geophy. Res.: Earth Surface*, 113, <https://doi:10.1029/2006JF000625>, 2008.
- 529 Alkhatib, M., Jennerjahn, T C., Samiaji, J.: Biogeochemistry of the Dumai River estuary,  
530 Sumatra, Indonesia, a tropical black-water river, *Limnol. & Oceanogr.*, 52, 2410-2417,  
531 <https://doi.org/10.4319/lo.2007.52.6.2410>, 2007.
- 532 Anderson, J. A. R.: *The tropical peat swamps of western Malesia, Mires: swamp, bog, fen and*  
533 *moor: regional studies*, 1983.
- 534 Aufdenkampe, A. K., Mayorga, E., Hedges, J. I., Llerena, C., Quay, P. D., Gudeman, J.,

535 Krusche, A. V., and Richey, J. E.: Organic matter in the Peruvian headwaters of the Amazon:  
536 Compositional evolution from the Andes to the lowland Amazon mainstem, *Org. Geochem.*, 38,  
537 337-364, <https://doi.org/10.1016/j.orggeochem.2006.06.003>, 2007.

538 Aufdenkampe, A. K., Mayorga, E., Raymond, P. A., Melack, J. M., Doney, S. C., Alin, S. R.,  
539 Aalto, R. E., and Yoo, K.: Riverine coupling of biogeochemical cycles between land, oceans,  
540 and atmosphere, *Front. in Ecol. & the Environ.*, 9, 53-60, <https://doi.org/10.189-0/100014>, 2011.

541 Bao, H., Lee, T. Y., Huang, J. C., Feng, X., Dai, M., and Kao, S. J.: Importance of Oceanian  
542 small mountainous rivers (SMRs) in global land-to-ocean output of lignin and modern biospheric  
543 carbon, *Sci. Rep.*, 5, 16217, <https://doi.org/10.1038/srep16217>, 2015.

544 Battin, T. J., Luysaert, S., Kaplan, L. A., Aufdenkampe, A. K., Richter, A., and Tranvik, L. J.:  
545 The boundless carbon cycle, *Nat. Geosci.*, 2, 598-600, <https://doi.org/10.1038/ngeo618>, 2009.

546 Baum, A., Rixen, T., and Samiaji, J.: Relevance of peat draining rivers in central Sumatra for  
547 the riverine input of dissolved organic carbon into the ocean, *Estuar. Coast. Shelf Sci.*, 73, 563-  
548 570, <https://doi.org/10.1016/j.ecss.2007.02.012>, 2007.

549 Benner. R., Maccubbin, A. E., and Hodson, R. E.: Anaerobic biodegradation of the lignin and  
550 polysaccharide components of lignocellulose and synthetic lignin by sediment microflora, *Appl.*  
551 *Environ. Microbiol.*, 47, 998-1004, 1984.

552 Benner. R., Fogel, M. L., Sprague, E. K., and Hodson, R. E.: Depletion of <sup>13</sup>C in lignin and its  
553 implications for stable carbon isotope studies, *Nature*, 329, 708, 1987.

554 Bianchi, T. S., Mitra, S., and McKee, B. A.: Sources of terrestrially-derived organic carbon in  
555 lower Mississippi River and Louisiana shelf sediments: implications for differential  
556 sedimentation and transport at the coastal margin, *Mar. Chem.*, 77, 211-223, [https://doi.org/10.1016/S0304-4203\(01\)00088-3](https://doi.org/10.1016/S0304-4203(01)00088-3), 2002.

557  
558 Bianchi, T. S., Bauer, J. E.: 5.03—particulate organic carbon cycling and transformation,  
559 *Treatise on estuarine and coastal science*, 5, 69-117, 2011.

560 Burdige, D. J.: Burial of terrestrial organic matter in marine sediments: A re-assessment, *Glob.*

561 Biogeochem. Cyc., 19(4), 2005.

562 Cook, S., Peacock, M., Evans, C. D., Page, S. E., Whelan, M. J., Gauci, V., and Kho, L. K.:  
563 Quantifying tropical peatland dissolved organic carbon (DOC) using UV-visible spectroscopy,  
564 Water Res., 115, 229-235, <https://doi.org/10.1016/j.watres.2017.02.059>, 2017.

565 Dignac, M. F., Knicker, H., Kögel-Knabner, I.: Effect of N content and soil texture on the  
566 decomposition of organic matter in forest soils as revealed by solid-state CPMAS NMR  
567 spectroscopy, Org. Geochem., 33, 1715-1726, 2002.

568 Dittmar, T., Lara, R. J.: Molecular evidence for lignin degradation in sulfate-reducing mangrove  
569 sediments (Amazonia, Brazil). Geochimi. Cosmochim. Acta, 65, 1417-1428, 2001.

570 Dittmar, T., Kattner, G.: The biogeochemistry of the river and shelf ecosystem of the Arctic  
571 Ocean: a review, Mar. chem., 83, 103-120, [https://doi.org/10.1016/S0304-4203\(03\)00105-1](https://doi.org/10.1016/S0304-4203(03)00105-1),  
572 2003.

573 Dommain, R., Couwenberg, J., Glaser, P. H., Joosten, H., and Suryadiputra, I. N. N.: Carbon  
574 storage and release in Indonesian peatlands since the last deglaciation, Quaternary Sci. Rev.,  
575 97, 1-32, <https://doi.org/10.1016/j.quascirev.2014.05.002>, 2014.

576 Drenzek, N. J., Montluçon, D. B., Yunker, M. B., Macdonald, R. W., and Eglinton, T. I.:  
577 Constraints on the origin of sedimentary organic carbon in the Beaufort Sea from coupled  
578 molecular <sup>13</sup>C and <sup>14</sup>C measurements, Mar. Chem., 103, 146-162, <https://doi.org/10.1016/j.->  
579 [marchem.2006.06.017](https://doi.org/10.1016/j.-marchem.2006.06.017), 2007.

580 Duboc, O., Dignac, M. F., Djukic, I., Zehetner, F., Gerzabek, M. H., & Rumpel, C.: Lignin  
581 decomposition along an Alpine elevation gradient in relation to physicochemical and soil  
582 microbial parameters. Glob. Cha. Biol., 20(7), 2272-2285, 2014.

583 Feng, X., Feakins, S. J., Liu, Z., Ponton, C., Wang, R. Z., Karkabi, E., Galy, V., Berelson, W.  
584 M., Nottingham, A. T., Meir, P., and West, A. J.: Source to sink: Evolution of lignin composition  
585 in the Madre de Dios River system with connection to the Amazon basin and offshore, J. of  
586 Geophys. Res.-Biogeo., 121, 1316-1338, <https://doi.org/10.1002/2016jg0033-23>, 2016.

587 Fog, K.: The effect of added nitrogen on the rate of decomposition of organic matter, *Biol. Rev.*,  
588 63, 433-462, 1988.

589 Gandois, L., Cobb, A. R., Hei, I. C., Lim, L. B. L., Salim, K. A., and Harvey, C. F.: Impact of  
590 deforestation on solid and dissolved organic matter characteristics of tropical peat forests:  
591 implications for carbon release, *Biogeochem.*, 114, 183-199, 2013.

592 Gandois, L., Teisserenc, R., Cobb, A. R., Chieng, H. I., Lim, L. B. L., Kamariah, A. S., Hoyt, A.,  
593 and Harvey, C. F.: Origin, composition, and transformation of dissolved organic matter in  
594 tropical peatlands, *Geochim. Cosmochim. Acta*, 137, 35-47, [https://doi.org/ 10.1016/j.gca-](https://doi.org/10.1016/j.gca-)  
595 [.2014.03.012](https://doi.org/10.1016/j.gca-2014.03.012), 2014.

596 Goldsmith, S. T., Carey, A. E., Lyons, W. B., Kao, S.-J., Lee, T. Y., and Chen, J.: Extreme storm  
597 events, landscape denudation, and carbon sequestration: Typhoon Mindulle, Choshui River,  
598 Taiwan, *Geology*, 36, <https://doi.org/10.1130/g24624a.1>, 2008.

599 Goñi, M. A., Hedges, J. I.: Sources and reactivities of marine-derived organic matter in coastal  
600 sediments as determined by alkaline CuO oxidation, *Geochim. Cosmochim. Acta*, 59, 2965-  
601 2981, 1995.

602 Goñi, M. A., Ruttenger, K. C., Eglinton, T. I.: A reassessment of the sources and importance  
603 of land-derived organic matter in surface sediments from the Gulf of Mexico, *Geochim.*  
604 *Cosmochim. Acta*, 62, 3055-3075, 1998.

605 Goñi, M. A., Montgomery, S.: Alkaline CuO oxidation with a microwave digestion system: Lignin  
606 analyses of geochemical samples, *Anal. Chem.*, 72 3116-3121, 2000.

607 Goñi, M. A., Yunker, M. B., Macdonald, R. W., and Eglinton, T. I.: The supply and preservation  
608 of ancient and modern components of organic carbon in the Canadian Beaufort Shelf of the  
609 Arctic Ocean, *Mar. Chem.*, 93, 53-73, <https://doi.org/10.1016/j.marchem.2004.08.001>, 2005.

610 Goni, M. A., Monacci, N., Gisewhite, R., Ogston, A., Crockett, J., and Nittrouer, C.: Distribution  
611 and sources of particulate organic matter in the water column and sediments of the Fly River  
612 Delta, Gulf of Papua (Papua New Guinea), *Estuar. Coast. Shelf Sci.*, 69, 225-245,



613 <https://doi.org/10.1016/j.ecss.2006.04.012>, 2006.

614 Hall, S.J., Silver, W., Timokhin, V. I., Hammel, K. E.: Lignin decompositions is sustained under  
615 fluctuating redox conditions in humid-tropical forest soils, *Glob. Chan. Biol.*, 21, 2818-2828,  
616 2015.

617 Hedges, J. I., Mann, D. C.: The characterization of plant tissues by their lignin oxidation  
618 products, *Geochimi. Cosmochim. Acta*, 43, 1803-1807, 1979.

619 Hedges, J. I., Ertel, J. R.: Characterization of lignin by gas capillary chromatography of cupric  
620 oxide oxidation products, *Anal. Chem.*, 54, 174-178, 1982.

621 Hedges, J. I., Cowie, G. L., Ertel, J. R., Barbour, R. J., and Hatcher, P. G.: Degradation of  
622 carbohydrates and lignins in buried woods, *Geochimi. Cosmochim. Acta*, 49, 701-711, 1985.

623 Hedges, J. I., Clark, W. A., Quay, P. D., Richey, J. E., Devol, A. H., and Santos, M.:  
624 Compositions and fluxes of particulate organic material in the Amazon River<sup>1</sup>, *Limnol. &*  
625 *Oceanogr.*, 31, 717-738, 1986.

626 Hedges, J. I., Blanchette, R. A., Weliky, K., and Devol, A. H.: Effects of fungal degradation on  
627 the CuO oxidation products of lignin: a controlled laboratory study, *Geochimi. Cosmochim. Acta*,  
628 52, 2717-2726, 1988.

629 Hernes, P. J., Benner, R.: Transport and diagenesis of dissolved and particulate terrigenous  
630 organic matter in the North Pacific Ocean, *Deep Sea Res. Part I*, 49(12), 2119-2132, 2002.

631 Hernes, P. J., Robinson, A. C., and Aufdenkampe, A. K.: Fractionation of lignin during leaching  
632 and sorption and implications for organic matter “freshness”, *Geophys. Res. Lett.*, 34,  
633 <https://doi.org/10.1029/2007gl031017>, 2007.

634 Hernes, P. J., Dyda, R. Y., and McDowell, W. H.: Connecting tropical river DOM and POM to  
635 the landscape with lignin, *Geochimi. Cosmochim. Acta*, 219, 143-159,  
636 <https://doi.org/10.1002/2017JG003935>, 2017.

637 Holtvoeth, J., Wagner, T., Schubert, C. J.: Organic matter in river-influenced continental margin  
638 sediments: The land-ocean and climate linkage at the Late Quaternary Congo fan (ODP Site

639 1075), *Geochem., Geophys., Geosys.*, 4(12), 1109, 2003.

640 Hooijer, A., Page, S., Jauhiainen, J., Lee, W. A., Lu, X. X., Idris, A., and Anshari, G.: Subsidence  
641 and carbon loss in drained tropical peatlands, *Biogeosciences*, 9, 1053-1071,  
642 <https://doi.org/10.5194/bg-9-1053-2012>, 2012.

643 Hoscilo, A., Page, S. E., Tansey, K. J., and Rieley, J. O.: Effect of repeated fires on land-cover  
644 change on peatland in southern Central Kalimantan, Indonesia, from 1973 to 2005, *Inter. J. of*  
645 *Wildland Fire*, 20, 578-588, 2011.

646 Houghton, R. A., Skole, D. L., Nobre, C. A., Hackler, J. L., Lawrence, K. T., and Chomentowski,  
647 W. H.: Annual fluxes of carbon from deforestation and regrowth in the Brazilian Amazon, *Nature*,  
648 403, 301, 2000.

649 Jennerjahn, T. C., Ittekkot, V., Klöpper, S., Adi, S., Purwo Nugroho, S., Sudiana, N., Yusmal,  
650 A., Prihartanto, and Gaye-Haake, B.: Biogeochemistry of a tropical river affected by human  
651 activities in its catchment: Brantas River estuary and coastal waters of Madura Strait, Java,  
652 Indonesia, *Estuar. Coast. Shelf Sci.*, 60, 503-514, <https://doi.org/10.1016/j.ecss.2004.02.008>,  
653 2004.

654 Jennerjahn, T. C., Soman, K., Ittekkot, V., Nordhaus, I., Sooraj, S., Priya, R. S., and Lahajnar,  
655 N.: Effect of land use on the biogeochemistry of dissolved nutrients and suspended and  
656 sedimentary organic matter in the tropical Kallada River and Ashtamudi estuary, Kerala, India,  
657 *Biogeochem.*, 90, 29-47, <https://doi.org/10.1007/s10533-008-9228-1>, 2008.

658 Jex, C. N., Pate, G. H., Blyth, A. J., Spencer, R. G. M., Hernes, P. J., Khan, S. J., and Baker,  
659 A.: Lignin biogeochemistry: from modern processes to Quaternary archives, *Quarter. Sci. Rev.*,  
660 87, 46-59, <https://doi.org/10.1016/j.quascirev.2013.12.028>, 2014.

661 Kao, S. J., Liu, K. K.: Particulate organic carbon export from a subtropical mountainous river  
662 (Lanyang Hsi) in Taiwan, *Limnol. & Oceanogr.*, 41, 1749-1757, 1996.

663 Keil, R. G., Tsamakis, E., Giddings, J. C., and Hedges, J. I.: Biochemical distributions (amino  
664 acids, neutral sugars, and lignin phenols) among size-classes of modern marine sediments

665 from the Washington coast, *Geochim. Cosmochim. Acta*, 62, 1347-1364, 1998.

666 Killops, S., Killops, V.: *Introduction to Organic Geochemistry*, 2nd edition (paperback),  
667 *Geofluids*, 5, 236-237, 2005.

668 Knorr, M., Frey, S.D. and Curtis, P.S.: Nitrogen additions and litter decomposition: A meta-  
669 analysis. *Ecology* 86, 3252–3257, 2005.

670 Koh, L. P., Butler, R. A., and Bradshaw, C. J. A.: Conversion of Indonesia's peatlands, *Front.*  
671 *in Ecol. & the Environ.*, 7, 238-238, <https://doi.org/10.1890/09.WB.013>, 2009.

672 Kononen, M., Jauhiainen, J., Laiho, R., Spetz, P., Kusin, K., Limin, S., Vasander, H.: Land use  
673 increases the recalcitrance of tropical peat, *Wetlands Ecol. Manage*, 24, 717–731, 2016.

674 Li, Z., Peterse, F., Wu, Y., Bao, H. Y., Eglinton, T. I., Zhang, J.: Sources of organic matter in  
675 Changjiang (Yangtze River) bed sediments: preliminary insights from organic geochemical  
676 proxies, *Org. Geochem.*, 85, 11-21, 2015.

677 Loh, P. S., Chen, C. T. A., Anshari, G. Z., Wang, J.T., Lou, J. Y., Wang, S.L.: A comprehensive  
678 survey of lignin geochemistry in the sedimentary organic matter along the Kapuas River (West  
679 Kalimantan, Indonesia), *J. of Asian Ear. Sci.*, 43(1), 118-129, 2012.

680 Lourençato, L. F., Bernardes, M. C., Buch, A. C., and Silva-Filho, E. V.: Lignin phenols in the  
681 paleoenvironmental reconstruction of high mountain peatlands from Atlantic Rainforest, SE-  
682 Brazil, *Catena*, 172, 509-515, <https://doi.org/10.1016/j.catena.2018.09.013>, 2019.

683 Martin, P., Cherukuru, N., Tan, A. S. Y., Sanwlani, N., Mujahid, A., and Müller, M.: Distribution  
684 and cycling of terrigenous dissolved organic carbon in peatland-draining rivers and coastal  
685 waters of Sarawak, Borneo, *Biogeosciences*, 15, 6847-6865, [https://doi.org/10.5194/bg-15-](https://doi.org/10.5194/bg-15-6847-2018)  
686 [6847-2018](https://doi.org/10.5194/bg-15-6847-2018), 2018.

687 Miettinen, J., Shi, C., and Liew, S. C.: Land cover distribution in the peatlands of Peninsular  
688 Malaysia, Sumatra and Borneo in 2015 with changes since 1990, *Glob. Ecol. Conserv.*, 6, 67-  
689 78, <https://doi.org/10.1016/j.gecco.2016.02.004>, 2016.

690 Milliman, J. D., Farnsworth, K. L.: Runoff, erosion, and delivery to the coastal ocean, *River*

691 discharge to the coastal ocean: a global synthesis, Cambridge University Press, Cambridge,  
692 UK, 13-69, 2011.

693 Moore, S., Gauci, V., Evans, C. D., and Page, S. E.: Fluvial organic carbon losses from a  
694 Bornean blackwater river, *Biogeosciences*, 8, 901-909, <https://doi.org/10.5194/bg-8-901-2011>,  
695 2011.

696 Moore, S., Evans, C. D., Page, S. E., Garnett, M. H., Jones, T. G., Freeman, C., Hooijer, A.,  
697 Wiltshire, A. J., Limin, S. H., and Gauci, V.: Deep instability of deforested tropical peatlands  
698 revealed by fluvial organic carbon fluxes, *Nature*, 493, 660-663,  
699 <https://doi.org/10.1038/nature11818>, 2013.

700 Müller, D., Warneke, T., Rixen, T., Muller, M., Jahari, S., Denis, N., ... & Notholt, J.: Lateral  
701 carbon fluxes and CO<sub>2</sub> outgassing from a tropical peat-draining river. *Biogeosciences*, 12(20),  
702 5967-5979, 2015.

703 Opsahl, S., Benner, R.: Early diagenesis of vascular plant tissues: lignin and  
704 cutin decomposition and biogeochemical implications, *Geochim. Cosmochim. Acta*, 59, 4889-  
705 4904, 1995.

706 Osono, T., Takeda, H.: Organic chemical and nutrient dynamics in decomposing beech leaf  
707 litter in relation to fungal ingrowth and succession during 3-year decomposition processes in a  
708 cool temperate deciduous forest in Japan, *Ecol. Res.*, 16, 649-670, 2001.

709 Otto, A., Simpson, M.J.: Evaluation of CuO oxidation parameters for determining the source  
710 and stage of lignin degradation in soil, *Biogeochem.*, 80, 121-142, 2006.

711 Page, S.E., Reiley, J.O., and Wust, R.: Lowland tropical peatland of Southeast Asia. In:  
712 *Peatlands: Evolution and Records of Environmental and Climate Changes* (eds., by Martini,  
713 I.P., etc.) Elsevier, pp145-171, 2006.

714 Page, S. E., Morrison, R., Malins, C., Hooijer, A., Rieley, J. O., and Jauhiainen, J.: Review of  
715 peat surface greenhouse gas emissions from oil palm plantations in Southeast Asia, *White  
716 paper*, 76, 2011.

716 Pradhan, U. K., Shirodkar, P., and Sahu, B.: Physico-chemical characteristics of the coastal

717 water off Devi estuary, Orissa and evaluation of its seasonal changes using chemometric  
718 techniques, *Curr. Sci.*, 96(9), 1203-1209, <http://www.jstor.org/stable/24105409>, 2009.

719 Pradhan, U. K., Wu, Y., Shirodkar, P. V., Zhang, J., and Zhang, G.: Sources and distribution of  
720 organic matter in thirty five tropical estuaries along the west coast of India-a preliminary  
721 assessment, *Estuar. Coast. Shelf Sci.*, 151, 21-33, <https://doi.org/10.1016/j.ecss.2014.09.010>,  
722 2014.

723 Prasad, M. B. K., Ramanathan, A. L.: Organic matter characterization in a tropical estuarine-  
724 mangrove ecosystem of India: preliminary assessment by using stable isotopes and lignin  
725 phenols, *Estu., Coast. & Shel. Sci.*, 84(4), 617-624, 2009.

726 Rieley, J. O., Page, S. E., Setiadi, B.: Distribution of peatlands in Indonesia, *Glob. Peat Resour.*,  
727 169-178, 1996.

728 Rieley, J. O., Wüst, R. A. J., Jauhainen, J., Page, S. E., Wösten, J. H. M., Hooijer, A., ... and  
729 Stahlhut, M.: Tropical peatlands: carbon stores, carbon gas emissions and contribution to  
730 climate change processes, *Peatlands and climate change*, Inter.Peat Society, 148-181, 2008.

731 Spencer, R. G. M., Hernes, P. J., Ruf, R., Baker, A., Dyda, R. Y., Stubbins, A., and Six, J.:  
732 Temporal controls on dissolved organic matter and lignin biogeochemistry in a pristine tropical  
733 river, Democratic Republic of Congo, *J. of Geophys. Res.-Biogeo.*, 115,  
734 <https://doi.org/10.1029/2009jg001180>, 2010.

735 Staub, J. R., Gastaldo, R. A.: Seasonal sediment transport and deposition in the Rajang River  
736 delta, Sarawak, East Malaysia, *Sci. Sediment. Geol.*, 133, 249-264, 2000.

737 Sun, S., Schefuß, E., Mulitza, S., Chiessi, C. M., Sawakuchi, A. O., Zabel, M., Baker, P. A.,  
738 Helter, J., Mollenhauer, G.: Origin and processing of terrestrial organic carbon in the Amazon  
739 system: lignin phenols in river, shelf, and fan sediments, *Biogeosciences*, 14(9), 2495-2512,  
740 2017.

741 Tareq, S. M., Tanaka, N., and Ohta, K.: Biomarker signature in tropical wetland: lignin phenol  
742 vegetation index (LPVI) and its implications for reconstructing the paleoenvironment, *Sci. Total*

743 Environ., 324, 91-103, <https://doi.org/10.1016/j.scitotenv.2003.10.020>, 2004.

744 Tesi, T., Semiletov, I., Dudarev, O., Andersson, A., and Gustafsson, Ö.: Matrix association  
745 effects on hydrodynamic sorting and degradation of terrestrial organic matter during cross-shelf  
746 transport in the Laptev and East Siberian shelf seas, *J. of Geophys. Res.-Biogeo.*, 121, 731-  
747 752, 2016.

748 Thevenot, M., Dignac, M. F., and Rumpel, C.: Fate of lignins in soils: A review, *Soil Biol. &*  
749 *Biochem.*, 42, 1200-1211, <https://doi.org/10.1016/j.soilbio.2010.03.017>, 2010.

750 Ward, N. D., Keil, R. G., Medeiros, P. M., Brito, D. C., Cunha, A. C., Dittmar, T., Yager, P. L.,  
751 Krusche, A. V., and Richey, J. E.: Degradation of terrestrially derived macromolecules in the  
752 Amazon River, *Nat. Geosci.*, 6, 530-533, <https://doi.org/10.1038/ngeo1817>, 2013.

753 Winterfeld, M., Goñi, M. A., Just, J., Hefter, J., and Mollenhauer, G.: Characterization of  
754 particulate organic matter in the Lena River delta and adjacent nearshore zone, NE Siberia –  
755 Part 2: Lignin-derived phenol compositions, *Biogeosciences*, 12, 2261-2283, [https://doi.org/](https://doi.org/10.5194/bg-12-2261-2015)  
756 [/10.5194/bg-12-2261-2015](https://doi.org/10.5194/bg-12-2261-2015), 2015.

757 Wit, F., Muller, D., Baum, A., Warneke, T., Pranowo, W. S., Muller, M., and Rixen, T.: The  
758 impact of disturbed peatlands on river outgassing in Southeast Asia, *Nat. Commun*, 6, 10155,  
759 <https://doi.org/10.1038/ncomms10155>, 2015.

760 Wu, Y., Bao, H., Yu, H., and Kattner G.: Temporal variability of particulate organic carbon in the  
761 lower Changjiang (Yangtze River) in the post-Three Gorges Dam period: Links to  
762 anthropogenic and climate impacts, *J. of Geophys. Res.-Biogeo.*, 120, 2194-2211, [https://do-](https://doi.org/10.1016/j.orggeochem.2015.04.006)  
763 [i.org/10.1016/j.orggeochem.2015.04.006](https://doi.org/10.1016/j.orggeochem.2015.04.006), 2015.

764 Wu, Y., Eglinton, T. I., Zhang, J., and Montlucon, D. B.: Spatiotemporal variation of the quality,  
765 origin, and age of particulate organic matter transported by the Yangtze River (Changjiang), *J.*  
766 *of Geophys. Res.- Biogeo.*, 123, 2908-2921, <https://doi.org/10.1029/2017JG004285>, 2018.

767 Yu, H., Wu, Y., Zhang, J., Deng, B., and Zhu, Z.: Impact of extreme drought and the Three  
768 Gorges Dam on transport of particulate terrestrial organic carbon in the Changjiang (Yangtze)

769 River, J. of Geophys. Res.- Ear. Surf., 116, <https://doi.org/10.1029/2011jf002012>, 2011.

770 Zaccone, C., Said-Pullicino, D., Gigliotti, G., Miano, T.M.: Diagenetic trends in the phenolic  
771 constituents of Sphagnum-dominated peat and its corresponding humic acid fraction, Org.  
772 Geochem., 39, 830-838, 2008.

773 Zhu, S., Dai, G., MA, T., Chen, L., Chen, D., Lu, X....Feng X.J.: Distribution of lignin phenols in  
774 comparison with plant-derived lipids in the alpine versus temperate grasslands soils, Plant and  
775 Soil, 1-14, 2019.

776 **Table 1 Average values of bulk geochemical parameters for plants, soils, and sediments collected**  
 777 **from the study systems**

| Samples                                | Time    | Mean Size<br>( $\mu\text{m}$ ) | Clay%           | Silt%           | DO<br>(mg/L)    | pH              | Salinity<br>(‰) | OC<br>(%)         | TN<br>(%)       | Atomic C/N         | $\delta^{13}\text{C}$<br>(‰) |
|----------------------------------------|---------|--------------------------------|-----------------|-----------------|-----------------|-----------------|-----------------|-------------------|-----------------|--------------------|------------------------------|
| <b>Angiosperm</b>                      |         |                                |                 |                 |                 |                 |                 |                   |                 |                    |                              |
| <b>leaves &amp; grasses<br/>(n=10)</b> | 03/2017 | —                              | —               | —               | —               | —               | —               | 48.53 $\pm$ 2.86  | 1.65 $\pm$ 0.64 | 40.44 $\pm$ 18.95  | -31.1 $\pm$ 2.5              |
| <b>Angiosperm<br/>woods(n=5)</b>       | 03/2017 | —                              | —               | —               | —               | —               | —               | 46.71 $\pm$ 4.71  | 0.52 $\pm$ 0.19 | 117.00 $\pm$ 45.32 | -31.8 $\pm$ 2.3              |
| <b>Roots(n=3)</b>                      | 03/2017 | —                              | —               | —               | —               | —               | —               | 38.60 $\pm$ 4.80  | 1.06 $\pm$ 0.64 | 50.10 $\pm$ 19.58  | -28.3 $\pm$ 0.4              |
| <b>Lower Rajang<br/>detritus(n=8)</b>  | 08/2016 | —                              | —               | —               | —               | —               | —               | 40.76 $\pm$ 13.69 | 0.94 $\pm$ 0.35 | 47.21 $\pm$ 13.03  | -29.9 $\pm$ 2.1              |
| <b>Sebuyau<br/>detritus(n=5)</b>       | 03/2017 | —                              | —               | —               | —               | —               | —               | 30.63 $\pm$ 15.00 | 0.73 $\pm$ 0.20 | 53.39 $\pm$ 31.68  | -28.1 $\pm$ 2.0              |
| <b>Simunjan<br/>detritus(n=4)</b>      | 03/2017 | —                              | —               | —               | —               | —               | —               | 33.46 $\pm$ 8.46  | 1.09 $\pm$ 0.35 | 43.44 $\pm$ 29.73  | -29.9 $\pm$ 0.7              |
| <b>Soil(n=8)</b>                       | 09/2017 | —                              | —               | —               | —               | —               | —               | 3.63 $\pm$ 0.63   | 0.19 $\pm$ 0.02 | 21.98 $\pm$ 2.50   | -28.4 $\pm$ 0.2              |
| <b>Upper Rajang<br/>(n=4)</b>          | 08/2016 | 212.9 $\pm$ 47.0               | 9.7 $\pm$ 2.5   | 10.4 $\pm$ 3.0  | 4.53 $\pm$ 4.42 | 6.74 $\pm$ 0.05 | 0               | 0.12 $\pm$ 0.02   | 0.02 $\pm$ 0.00 | 8.44 $\pm$ 2.10    | -28.1 $\pm$ 0.5              |
| <b>Lower Rajang<br/>(n=16)</b>         | 08/2016 | 41.9 $\pm$ 43.3                | 32.3 $\pm$ 11.7 | 45.4 $\pm$ 14.8 | 3.64 $\pm$ 0.66 | 7.33 $\pm$ 0.52 | 15.4 $\pm$ 10.8 | 1.07 $\pm$ 0.46   | 0.11 $\pm$ 0.05 | 11.44 $\pm$ 1.69   | -28.6 $\pm$ 0.6              |
| <b>Lower Rajang<br/>(n=5)</b>          | 03/2017 | 30.9 $\pm$ 9.8                 | 29.3 $\pm$ 3.1  | 54.9 $\pm$ 2.8  | 5.82 $\pm$ 0.78 | 6.66 $\pm$ 0.26 | 0.1 $\pm$ 0.2   | 1.26 $\pm$ 0.37   | 0.12 $\pm$ 0.02 | 11.68 $\pm$ 1.90   | -29.1 $\pm$ 0.2              |
| <b>Maludam<br/>(n=5)</b>               | 03/2017 | 9.3 $\pm$ 2.3                  | 39.6 $\pm$ 2.7  | 59.3 $\pm$ 2.0  | 3.24 $\pm$ 2.24 | 4.93 $\pm$ 1.71 | 7.2 $\pm$ 10.0  | 2.22 $\pm$ 0.69   | 0.20 $\pm$ 0.05 | 12.83 $\pm$ 1.80   | -27.4 $\pm$ 0.6              |
| <b>Maludam<br/>(n=2)</b>               | 09/2017 | 12.1                           | 39.2            | 58.3            | 4.96            | 6.69            | 11.5            | 2.02              | 0.19            | 12.43              | -28.2                        |
| <b>Sebuyau<br/>(n=6)</b>               | 03/2017 | 24.6 $\pm$ 18.5                | 31.6 $\pm$ 6.5  | 58.8 $\pm$ 8.3  | 3.07 $\pm$ 1.92 | 5.40 $\pm$ 5.48 | 5.5 $\pm$ 6.5   | 2.37 $\pm$ 0.69   | 0.16 $\pm$ 0.03 | 17.37 $\pm$ 4.56   | -27.8 $\pm$ 0.3              |
| <b>Sebuyau<br/>(n=5)</b>               | 09/2017 | 15.7 $\pm$ 4.0                 | 30.4 $\pm$ 3.6  | 66.1 $\pm$ 3.1  | 4.30 $\pm$ 1.36 | 7.45 $\pm$ 0.22 | 2.3 $\pm$ 4.5   | 2.79 $\pm$ 1.75   | 0.20 $\pm$ 0.10 | 15.42 $\pm$ 1.96   | -28.2 $\pm$ 0.4              |
| <b>Simunjan<br/>(n=6)</b>              | 03/2017 | 20.2 $\pm$ 10.3                | 22.0 $\pm$ 5.3  | 71.0 $\pm$ 6.5  | 1.85 $\pm$ 0.65 | 5.22 $\pm$ 0.61 | 0               | 2.58 $\pm$ 1.03   | 0.19 $\pm$ 0.08 | 16.44 $\pm$ 3.03   | -28.2 $\pm$ 0.5              |
| <b>Simunjan<br/>(n=6)</b>              | 09/2017 | 23.5 $\pm$ 8.10                | 20.9 $\pm$ 4.8  | 71.0 $\pm$ 3.1  | 4.00 $\pm$ 1.15 | 5.04 $\pm$ 0.57 | 0               | 2.59 $\pm$ 0.53   | 0.18 $\pm$ 0.05 | 17.86 $\pm$ 4.56   | -28.4 $\pm$ 0.5              |

778



779 **Table 2 Average values of lignin phenols parameters for plants, soils, and sediments from the study systems (V: vallinyl phenols; S: syringyl phenols; C: cinnamyl**  
780 **phenols, P: p-hydroxyl phenols; DHBA: 3,5-dihydroxy benzoic acid; see the main text for definitions of  $\Sigma 8$ ,  $\Lambda 8$ , Ad/Al, and LPVI)**  
781

| Samples                                       | Time    | $\Sigma 8$<br>(mg/10 g dw) | $\Lambda 8$<br>(mg/100 mg OC) | V         | S         | C         | S/V       | C/V       | (Ad/Al) <sub>v</sub> | (Ad/Al) <sub>s</sub> | P/(V+S)   | DHBA      | DHBA/V    | LPVI     |
|-----------------------------------------------|---------|----------------------------|-------------------------------|-----------|-----------|-----------|-----------|-----------|----------------------|----------------------|-----------|-----------|-----------|----------|
| <b>Angiosperm leaves &amp; grasses (n=10)</b> | 03/2017 | 317.94 ±160.00             | 6.64±3.38                     | 2.08±1.29 | 3.31±2.09 | 1.11±0.54 | 1.73±0.52 | 0.72±0.39 | 0.38±0.14            | 0.28±0.09            | 0.22±0.11 | 0.16±0.04 | 0.13±0.07 | 1420±910 |
| <b>Angiosperm woods(n=5)</b>                  | 03/2017 | 817.58±270.00              | 17.54±5.66                    | 7.65±2.75 | 9.31±2.90 | 0.58±0.43 | 1.27±0.24 | 0.07±0.04 | 0.33±0.07            | 0.24±0.13            | 0.04±0.00 | 0.10±0.06 | 0.01±0.01 | 87±34    |
| <b>Roots(n=3)</b>                             | 03/2017 | 312.98±44.51               | 8.24±1.96                     | 2.63±0.82 | 5.15±1.21 | 0.46±0.10 | 2.01±0.41 | 0.18±0.05 | 0.34±0.04            | 0.37±0.07            | 0.30±0.45 | 0.11±0.13 | 0.05±0.07 | 18±6     |
| <b>Lower detritus(n=8)</b>                    | 08/2016 | 418.98±151.87              | 11.57±6.47                    | 5.40±2.60 | 5.35±3.73 | 0.86±0.56 | 0.89±0.24 | 0.18±0.10 | 0.35±0.09            | 0.27±0.12            | 0.24±0.10 | 0.26±0.18 | 0.08±0.13 | 10±55    |
| <b>Sebuyau detritus(n=5)</b>                  | 03/2017 | 638.41±373.55              | 20.39±3.15                    | 9.63±2.01 | 9.70±2.29 | 1.05±0.64 | 1.04±0.33 | 0.11±0.05 | 0.34±0.13            | 0.37±0.09            | 0.15±0.09 | 0.16±0.11 | 0.02±0.01 | 85±34    |
| <b>Simunjan detritus(n=4)</b>                 | 03/2017 | 534.62±277.93              | 15.51±5.88                    | 7.79±2.42 | 6.72±4.37 | 1.00±0.95 | 0.82±0.39 | 0.15±0.17 | 0.32±0.06            | 0.25±0.09            | 0.08±0.07 | 0.14±0.02 | 0.02±0.00 | 80±54    |
| <b>Soil(n=8)</b>                              | 09/2017 | 29.67±5.13                 | 8.25±0.96                     | 3.89±0.45 | 4.10±0.53 | 0.27±0.05 | 1.05±0.06 | 0.07±0.02 | 0.38±0.04            | 0.30±0.06            | 0.28±0.03 | 0.37±0.05 | 0.10±0.02 | 69±10    |
| <b>Upper Rajang (n=4)</b>                     | 08/2016 | 0.16±0.08                  | 1.32±0.55                     | 0.89±0.29 | 0.37±0.22 | 0.06±0.05 | 0.38±0.16 | 0.06±0.05 | 1.04±0.23            | 0.39±0.15            | 0.51±0.04 | 0.07±0.05 | 0.07±0.03 | 18±11    |
| <b>Lower Rajang (n=16)</b>                    | 08/2016 | 7.55±3.96                  | 6.57±2.09                     | 3.42±1.05 | 3.01±1.00 | 0.14±0.12 | 0.87±0.09 | 0.04±0.03 | 0.43±0.13            | 0.26±0.10            | 0.16±0.07 | 0.29±0.13 | 0.09±0.03 | 48±11    |
| <b>Lower Rajang (n=5)</b>                     | 03/2017 | 10.33±2.12                 | 8.54±1.67                     | 4.42±0.82 | 3.83±0.80 | 0.29±0.10 | 0.86±0.03 | 0.07±0.02 | 0.41±0.07            | 0.30±0.11            | 0.17±0.02 | 0.23±0.11 | 0.05±0.02 | 52±7     |
| <b>Maludam (n=5)</b>                          | 03/2017 | 14.21±6.66                 | 6.21±1.40                     | 3.62±0.99 | 2.53±0.46 | 0.07±0.05 | 0.71±0.07 | 0.02±0.02 | 0.58±0.18            | 0.30±0.18            | 0.20±0.01 | 0.44±0.13 | 0.12±0.04 | 33±6     |
| <b>Maludam (n=2)</b>                          | 09/2017 | 12.55                      | 6.24                          | 3.21      | 2.76      | 0.27      | 0.8       | 0.09      | 0.43                 | 0.30                 | 0.16      | 0.18      | 0.06      | 62       |

|                           |         |             |           |           |           |            |           |           |           |           |           |           |           |       |
|---------------------------|---------|-------------|-----------|-----------|-----------|------------|-----------|-----------|-----------|-----------|-----------|-----------|-----------|-------|
| <b>Sebuyau<br/>(n=6)</b>  | 03/2017 | 18.02±7.07  | 7.75±2.10 | 4.50±1.33 | 3.12±0.82 | 0.13±0.108 | 0.70±0.05 | 0.03±0.02 | 0.47±0.07 | 0.34±0.06 | 0.17±0.04 | 0.33±0.08 | 0.08±0.01 | 33±6  |
| <b>Sebuyau<br/>(n=5)</b>  | 09/2017 | 22.06±11.44 | 8.18±0.98 | 4.85±0.68 | 3.16±0.43 | 0.17±0.11  | 0.66±0.08 | 0.04±0.03 | 0.55±0.08 | 0.32±0.12 | 0.16±0.02 | 0.18±0.09 | 0.04±0.02 | 31±9  |
| <b>Simunjan<br/>(n=6)</b> | 03/2017 | 18.45±5.96  | 7.30±1.04 | 4.03±0.51 | 2.96±0.60 | 0.31±0.17  | 0.73±0.11 | 0.08±0.05 | 0.48±0.10 | 0.41±0.04 | 0.20±0.05 | 0.36±0.05 | 0.09±0.01 | 49±24 |
| <b>Simunjan<br/>(n=6)</b> | 09/2017 | 20.09±3.20  | 7.86±0.91 | 4.54±0.80 | 3.09±0.31 | 0.23±0.20  | 0.69±0.09 | 0.06±0.06 | 0.47±0.05 | 0.36±0.08 | 0.17±0.03 | 0.37±0.09 | 0.08±0.02 | 41±22 |

---

782

783

784

785

786 **Table 3 Comparison of bulk and lignin phenols parameters among river systems worldwide**

787

| Samples           | Station         | OC (%)            | TN (%)    | C/N             | $\delta^{13}\text{C}$ (‰) | $\Sigma 8$ (mg/10g dw) | $\wedge 8$ (mg/100 mg OC) | S/V                  | C/V                   | (Ad/Al)v              | (Ad/Al)s              | P/(S+V)   | DHBA/V    | References    |
|-------------------|-----------------|-------------------|-----------|-----------------|---------------------------|------------------------|---------------------------|----------------------|-----------------------|-----------------------|-----------------------|-----------|-----------|---------------|
| Amazon River      | estuary         | 0.13~1.44         | —         | —               | -29.4~-27.5               | 0.10~11.05             | 0.75~9.27                 | 0.84~1.51            | 0.12~0.47             | 0.26~0.61             | 0.15~0.56             | —         | —         | 1             |
| Congo River       | submerged delta | 0.80~4.20<br>2.10 | —         | 5.8~10.1<br>8.3 | -23.5~-19.0               | —                      | 0.07~0.37<br>0.15±16%     | 0.47~1.38<br>0.87±7% | 0.15~0.39<br>0.28±13% | 0.47~1.74<br>0.72±17% | 0.26~1.94<br>0.46±14% | —         | —         | 2             |
| Pichavaram River  | estuary         | —                 | —         | 14.2±1.3        | -27.2±1.5                 | —                      | —                         | 1.26±0.32            | 0.19±0.12             | 0.68±0.11             | 0.81±0.21             | 0.57±0.10 | —         | 3             |
| 35 Indian rivers  | North group     | 0.61±0.30         | 0.04±0.01 | 18.7±6.9        | -22.9±0.9                 | 0.11±0.12              | 1.60±1.00                 | 0.90±0.20            | 0.20±0.10             | 0.70±0.20             | —                     | 0.40±0.20 | 0.30±0.20 | 4             |
|                   | South group     | 2.30±0.60         | 0.12±0.03 | 19.8±4.1        | -26.3±0.8                 | 1.7±0.5                | 6.70±2.80                 | 1.50±0.50            | 0.30±0.10             | 0.50±0.10             | —                     | 0.20±0.20 | 0.10±0.20 |               |
| Kapuas River      | whole basin     | 0.55~14.20        | 0.05~0.55 | 11.0~34.8       | -30.4~-27.3               | —                      | 0.13~3.70                 | 0.34~1.18            | 0.28~1.40             | 0.71~2.01             | 0.72~2.12             | —         | —         | 5             |
| Rajang River      | estuary         | 1.12±0.50         | 0.12±0.05 | 11.6±1.7        | -28.6±0.6                 | 7.55±3.96              | 6.57±2.09                 | 0.87±0.09            | 0.04±0.03             | 0.43±0.13             | 0.26±0.10             | 0.16±0.07 | 0.09±0.03 | This research |
| Maludam River     | estuary         | 2.22±0.69         | 0.20±0.05 | 12.8±1.8        | -27.4±0.6                 | 14.21±6.66             | 6.21±1.40                 | 0.71±0.07            | 0.02±0.02             | 0.58±0.18             | 0.30±0.18             | 0.20±0.01 | 0.12±0.04 |               |
| Sebuyau River     | whole basin     | 2.37±0.69         | 0.16±0.03 | 17.4±4.6        | -27.8±0.3                 | 18.02±7.07             | 7.75±2.10                 | 0.70±0.05            | 0.03±0.02             | 0.47±0.07             | 0.34±0.06             | 0.17±0.04 | 0.08±0.01 |               |
| Simunjan River    | whole basin     | 2.58±1.03         | 0.19±0.08 | 16.4±3.0        | -28.2±0.5                 | 18.45±5.96             | 7.30±1.04                 | 0.73±0.11            | 0.08±0.05             | 0.48±0.10             | 0.41±0.04             | 0.20±0.05 | 0.09±0.01 | 6             |
| Yangtze River     | whole basin     | 0.64±0.06         | —         | —               | -25.0±0.1                 | 3.60±0.18              | 5.66±0.33                 | 1.16±0.05            | 0.37±0.01             | —                     | —                     | —         | —         |               |
| Mississippi River | estuary         | 1.20±0.50         | 0.1±0.06  | 13.4±2.8        | -23.7±0.8                 | —                      | 1.64±0.53                 | 0.93±0.30            | 0.03±0.01             | 0.27±0.14             | 0.20±0.07             | —         | —         | 7             |

|                       |        |           |      |          |           |           |           |           |           |           |           |           |      |   |
|-----------------------|--------|-----------|------|----------|-----------|-----------|-----------|-----------|-----------|-----------|-----------|-----------|------|---|
| <b>Lena River</b>     | delta  | 2.06±0.33 | —    | 15.9±3.3 | —         | 0.41±0.19 | 1.96±0.81 | 0.43±0.02 | 0.42±0.36 | 1.28±0.30 | 1.04±0.24 | 0.30±0.03 | —    | 8 |
| <b>Pristine peat</b>  | Brunei | 52.40     | 1.95 | 31.4     | -30.4±0.8 | —         | 5.65      | 0.82      | 0.05      |           |           | 0.28±0.05 | 0.12 |   |
| <b>Disturbed peat</b> | Brunei | 50.95     | 2.09 | 28.4     | -29.5±0.6 | —         | 10.29     | 0.97      | 0.05      | 0.42±0.10 | 0.40±0.01 | 0.22±0.10 | 0.07 | 9 |

788 References: 1. Sun S, Schefuß E, Mulitza S et al., 2017; 2. Holtvoeth J, Wagner T, Schubert C J. 2003; 3. Prasad M B K, Ramanathan A L. 2009; 4. Pradhan U K, Wu Y,  
789 Shirodkar P V et al., 2014; 5. Loh P S, Chen C T A, Anshari G Z et al., 2012; 6. Li Z, Peterse F, Wu Y et al., 2015; 7. Bianchi T S, Mitra S, McKee B A. 2002; 8. Winterfeld M,  
790 Goñi M, Just J et al., 2015; 9. Gandois L, Teisserenc R, Cobb A R et al., 2014.

791  
792  
793  
794  
795

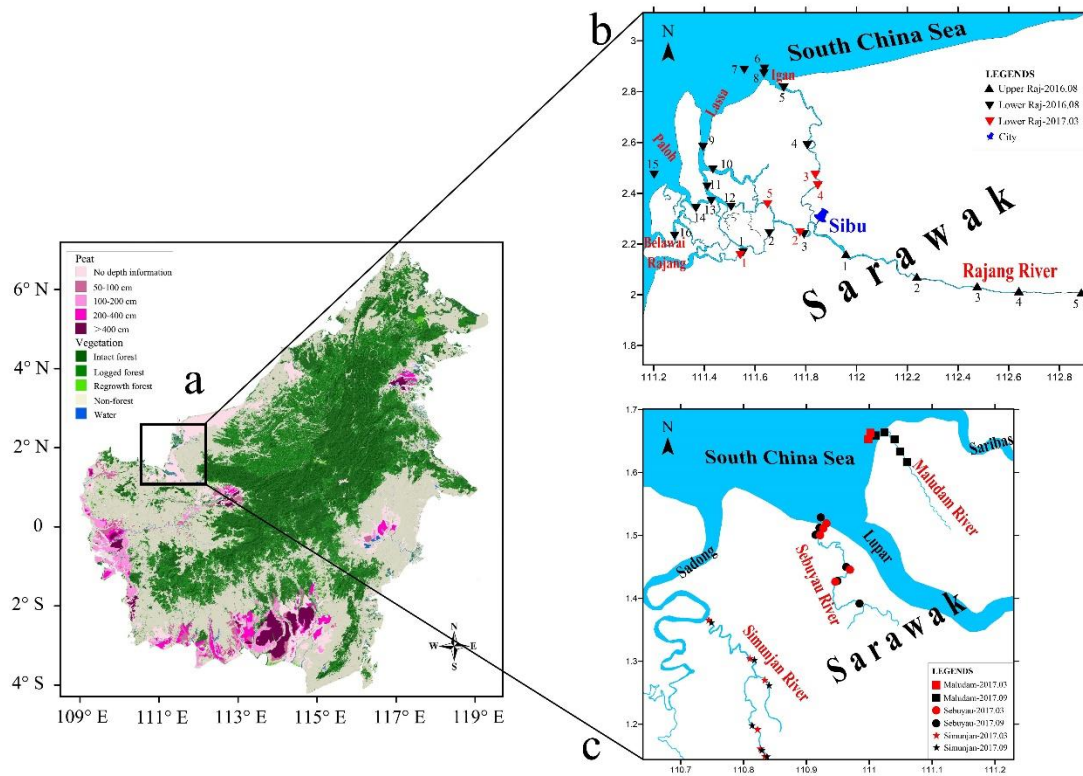

796

797 Figure 1 (a) Peat and vegetation distribution in the study region (modified from <https://www.cifor.org/map/atlas/>). (b) Sediment sampling sites along the  
 798 Rajang and tributaries. The city of Sibu divides the river into upper and lower reaches. (c) Sediment sampling sites along the three small rivers. Locations  
 799 of samples collected from the Maludam, Sebuyau, and Simunjan are indicated by squares, circles, and stars, respectively.

800

801

802

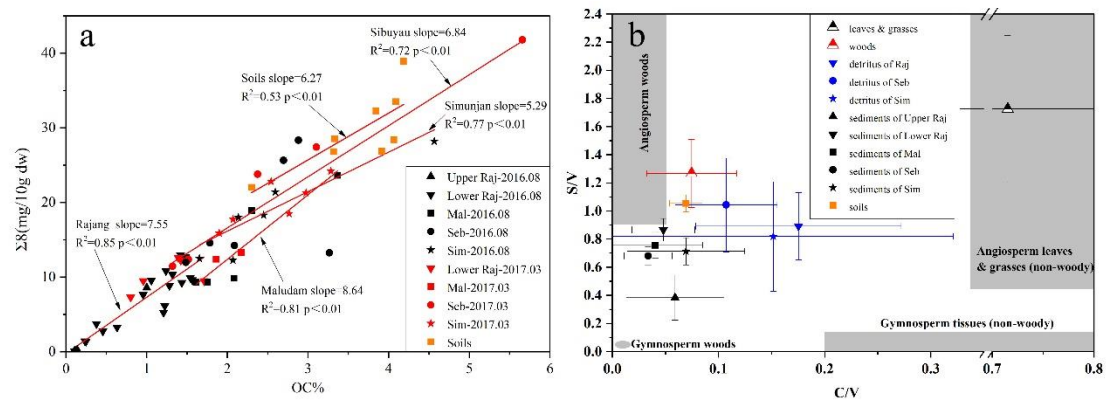

803

804 Figure 2 (a) Correlation of OC% with  $\Sigma 8$  among the various study systems. (b) Variations of S/V versus C/V of different samples from the study systems.

805 Raj: Rajang; Seb: Sebuyau; Sim: Simunjan; Mal: Maludam.

806

807

808

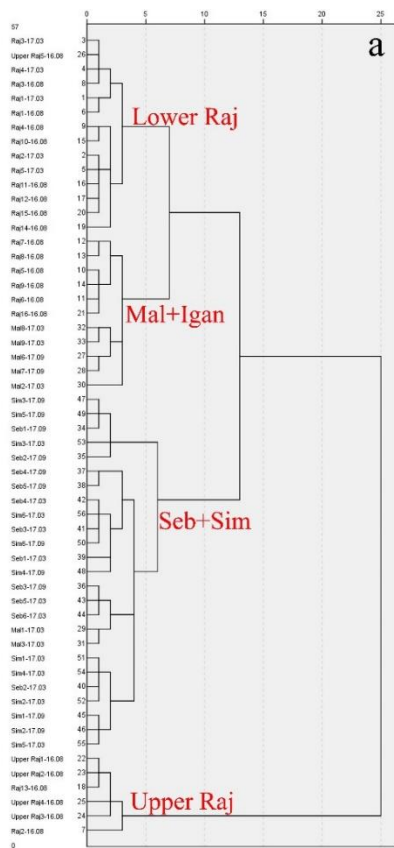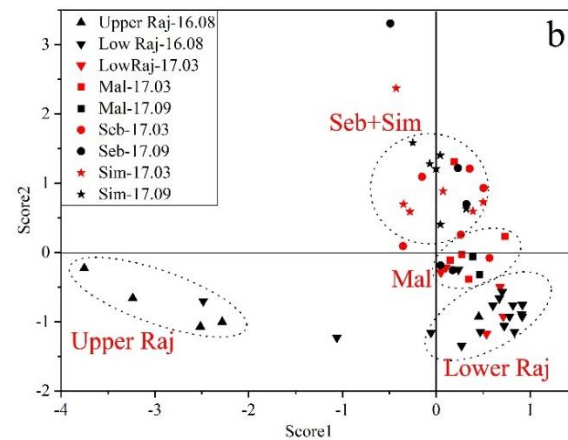

809

810

811 Figure 3 (a) Cluster analysis of the study systems based on bulk and lignin phenols parameters. (b) Plot of PCA results based on the distribution of  
 812 scores 1 and 2. Raj: Rajang; Seb: Sebuyau; Sim: Simunjan; Mal: Maludam.

813

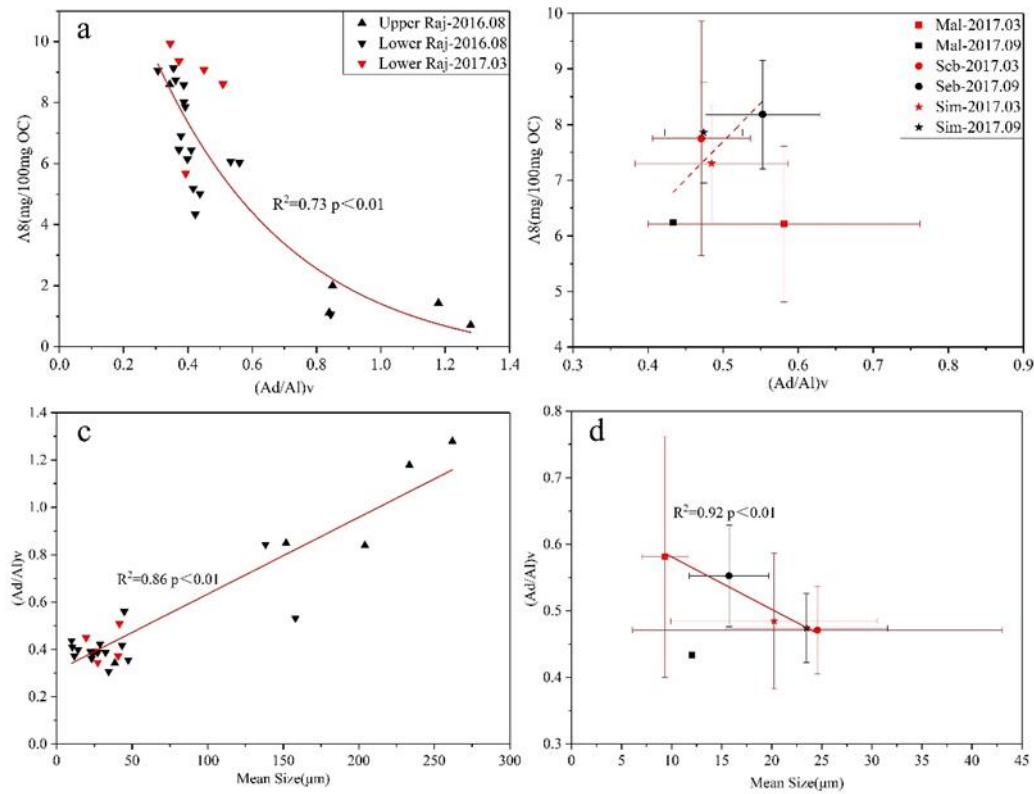

814

815 Figure 4 Variation in  $(Ad/Al)_v$  with  $\Delta 8$  values of sediments from (a) the Rajang and (b) the small river systems. Variation in  $(Ad/Al)_v$  with mean sediment

816 grain size for (c) the Rajang and (d) the small river systems.



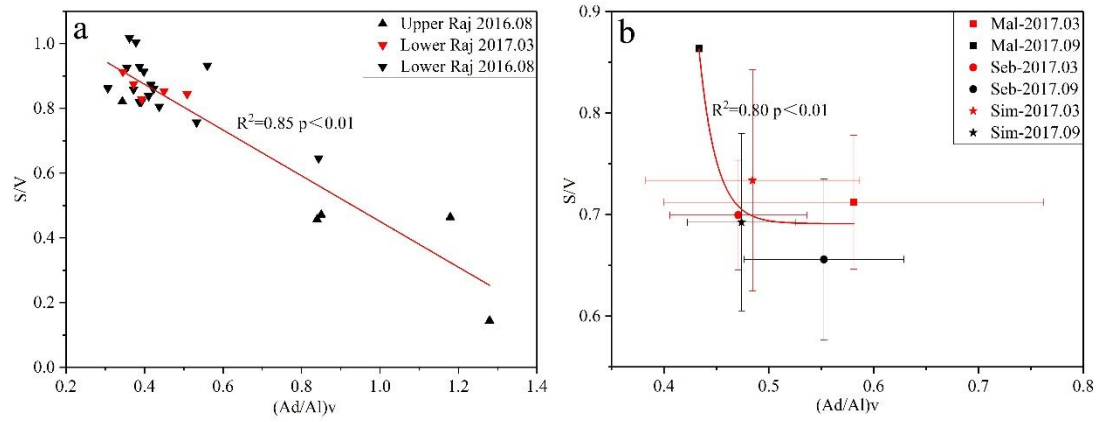

817

818 Figure 5 Relationship between  $(Ad/Al)_v$  and  $S/V$  ratios based on average values of the various systems for (a) the Rajang and (b) the small river systems.

819

820

821

822

823

824

825

826

827

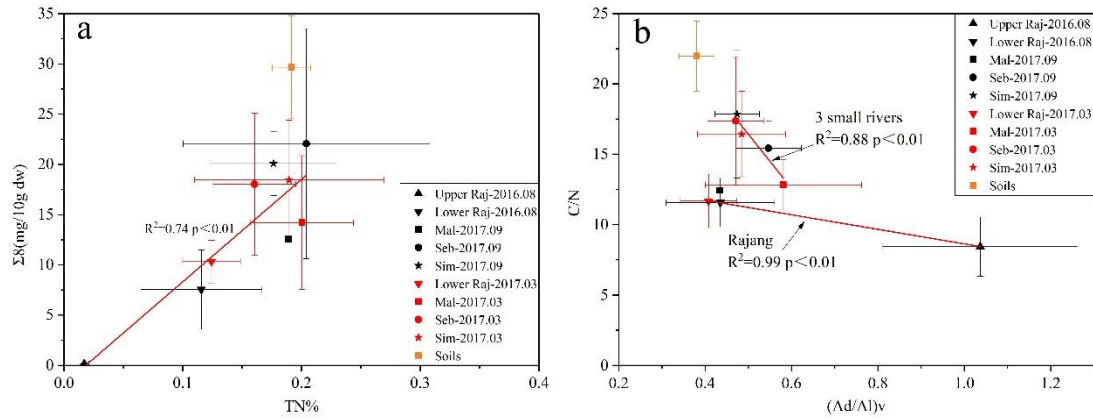

828

829 Figure 6 (a) Correlation of TN% with  $\Sigma 8$  based on average values of the study systems. (b) Correlation of  $(Ad/Al)_v$  with C/N ratio based on average  
830 values of the study systems.

831

832

833
